# Supplementary material
Source: MDPI journal article supplement (https://www.mdpi.com/search?q=ijms-17-01556)
Supplement: s001 [file ijms-17-01556-s001.pdf]

# Supplementary Materials: Identification of Reference Genes for RT-qPCR Data Normalization in *Cannabis sativa* Stem Tissues

Lauralie Mangeot-Peter, Sylvain Legay, Jean-Francois Hausman, Sergio Esposito and Gea Guerriero

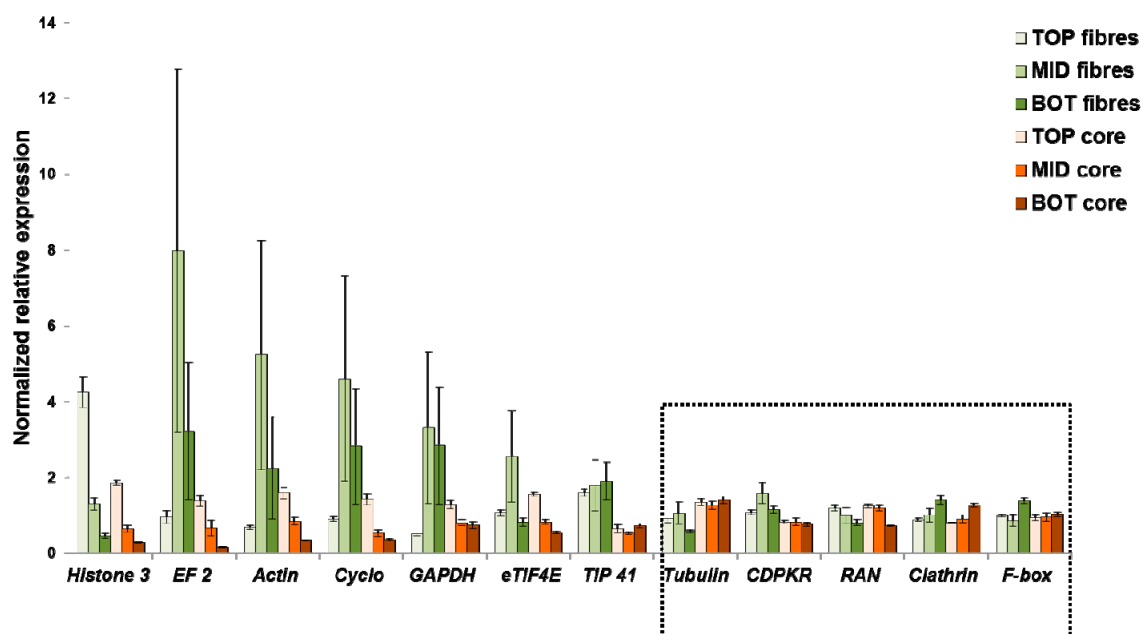

**Figure S1.** Expression of the different reference genes in hemp stem tissues. Error bars indicate the standard error of the mean ( $n = 4$ ). The boxed genes correspond to those necessary for normalization when both types of hemp stem tissues are considered, according to geNorm<sup>PLUS</sup>.

**Table S1.** Hemp reference and target genes analyzed in this study with relative accession numbers at the Medicinal Plant Genome Resource.

| Gene Name       | Locus Number                         |
|-----------------|--------------------------------------|
| <i>Histone3</i> | csa_locus_1853_iso_4_len_1208_ver_2  |
| <i>EF2</i>      | csa_locus_674_iso_1_len_2081_ver_2   |
| <i>Actin</i>    | csa_locus_2263_iso_5_len_1488_ver_2  |
| <i>Cyclo</i>    | csa_locus_6842_iso_2_len_854_ver_2   |
| <i>GAPDH</i>    | csa_locus_1460_iso_2_len_1872_ver_2  |
| <i>eTIF4E</i>   | csa_locus_9035_iso_2_len_909_ver_2   |
| <i>TIP41</i>    | csa_locus_3380_iso_1_len_1164_ver_2  |
| <i>Tubulin</i>  | csa_locus_11261_iso_1_len_1086_ver_2 |
| <i>CDPK</i>     | csa_locus_8286_iso_2_len_2019_ver_2  |
| <i>RAN</i>      | csa_locus_1455_iso_4_len_1015_ver_2  |
| <i>Clathrin</i> | csa_locus_5464_iso_6_len_1880_ver_2  |
| <i>F-box</i>    | csa_locus_16122_iso_2_len_2075_ver_2 |
| <i>TRA1</i>     | csa_locus_4950_iso_5_len_1428_ver_2  |
| <i>TRA2</i>     | csa_locus_5284_iso_4_len_790_ver_2   |
| <i>DHS1</i>     | csa_locus_3880_iso_9_len_1916_ver_2  |
| <i>DHS2</i>     | csa_locus_1565_iso_10_len_932_ver_2  |

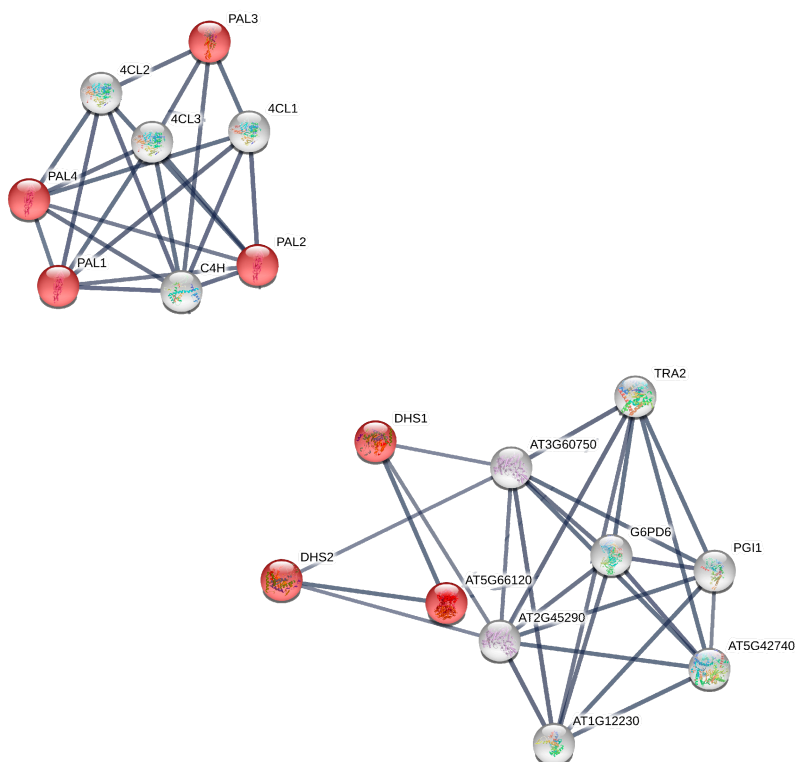

**Figure S2.** STRING network (<http://string-db.org/>) with medium confidence interaction score (0.400). The aromatic amino acid metabolic process is highlighted in red. The thicker lines correspond to an edge confidence >0.900, the thinner lines are >0.400. PAL: phenylalanine ammonia lyase; 4CL: 4-coumarate: 4-coumarate-CoA ligase; C4H: cinnamate 4-hydroxylase; PGI and AT5G42740: glucose-6-phosphate isomerases; G6PD: glucose-6-phosphate dehydrogenase; AT3G60750 and AT2G45290: transketolases.

**HISTONE3**

```

Marijuana-C32096195
L.usitatissimum-LUS10013948
Textile-hemp-csa_locus_1853_iso_4_len_1208_ver_2
H.lupulus-HL.SW.V1.0.G020502.1
-----
ATGAAGGATCCTTCTGTCCACCTCATCCATCCGCTCCATTACCAATCCCACCGTTGAT
-----

Marijuana-C32096195
L.usitatissimum-LUS10013948
Textile-hemp-csa_locus_1853_iso_4_len_1208_ver_2
H.lupulus-HL.SW.V1.0.G020502.1
-----
ATCCCTCCACCATCCAACCGCCACAATCTTCTCTACCGCAATAAAATCCCACCATTT
-----TT
-----

Marijuana-C32096195
L.usitatissimum-LUS10013948
Textile-hemp-csa_locus_1853_iso_4_len_1208_ver_2
H.lupulus-HL.SW.V1.0.G020502.1
-----
TCTTCACCGTTTCATCATCATCAGTACCAACATCAGCTCAGAATCCCAATCTACCGATT
TCCTC--AA--GCTTCTCAAGAACAAAACAAA--CAGA-----CAAACACAG
-----

Marijuana-C32096195
L.usitatissimum-LUS10013948
Textile-hemp-csa_locus_1853_iso_4_len_1208_ver_2
H.lupulus-HL.SW.V1.0.G020502.1
-----
CCCTACTCCTCCCTCTCTCATTCAATGGCTCGCACCAAGCAAACAGCTCGCAAGTCCACC
CAAAGAACTAAGCTTTCTCAATCAATGGCTCGTACCAAGCAGACTGCTCGCAATCGACC
-----ATGGCTCGTACCAAGCAAACAGTCTCGCAAGTCCGACC
-----

Marijuana-C32096195
L.usitatissimum-LUS10013948
Textile-hemp-csa_locus_1853_iso_4_len_1208_ver_2
H.lupulus-HL.SW.V1.0.G020502.1
-----
GGAGGCAAGGCCCAAGGAAGCAGCTGGCCACCAAGGCAGCAAGGAAGTCTCGCCGGCC
GGAGGCAAGGCCCAAGGAAGCAGCTGGCGACTAAGGCGGCAAGGAAGTCTCGGCTCCAGCG
GGAGGCAAGGCCCAAGGAAGCACTGGCAACCAAGGCCGCAAGGAAGTCTCGCCGGCC
-----

Marijuana-C32096195
L.usitatissimum-LUS10013948
Textile-hemp-csa_locus_1853_iso_4_len_1208_ver_2
H.lupulus-HL.SW.V1.0.G020502.1
-----
ACCGGAGGAGTGAAGAAGCCCCACAGATTCAGGCCGGGAACCGTCTCTCGGTGAGATA
ACAGGAGGTTGAAGAAGCCTCATCGGTTCAAGCCAGGAAGTCTGCTCTGAGAGAGATC
ACCGGTGGTGAAGAAGCCTCATCGGTTCAAGCCGGAAGTCTGCTCTGAGGAGATC
-----

Marijuana-C32096195
L.usitatissimum-LUS10013948
Textile-hemp-csa_locus_1853_iso_4_len_1208_ver_2
H.lupulus-HL.SW.V1.0.G020502.1
-----
CGCAAGTACCAGAAGAGCAGCCGAGCTTCTGATCCGAAAGCTTCCCTTTCAGCGCTCGTT
AGAAATACCAGAAGAGCAGCTGAGCTTCTCATCAGGAAGTTCCTTTCCAGAGGCTTCTC
AGGAAGTATCAGAAGAGCAGCTGAGCTTCTGATCAGGAAGTTCCTTTCCAGAGGCTTCTC
-----

Marijuana-C32096195
L.usitatissimum-LUS10013948
Textile-hemp-csa_locus_1853_iso_4_len_1208_ver_2
H.lupulus-HL.SW.V1.0.G020502.1
-----
CGTGAGATCGCCAGGATTTCAAGACAGATCTCAGGTTCCAGAGCTCCGAGTGTCTGGT
AGGGAAATCGCTCAAGATTTCAAGACTGATCTTCTGTTCCAGAGCAGCGCCGCTCTCCGCT
AGGGAGATCGCTCAGGATTTCAAGACTGATCTTCTGTTCCAGAGCAGCGCCGCTCTCCGCT
-----

Marijuana-C32096195
L.usitatissimum-LUS10013948
Textile-hemp-csa locus 1853 iso 4 len 1208 ver 2
H.lupulus-HL.SW.V1.0.G020502.1
-----
CTACAGGAGGCGAGCCGAGGCTATCTCGTGGACTGTTCCGAGGATACTAACCTCTGCGCC
CTTCAAGAGGCGCGGAGGCTACTTGGTGGTGTGTTGAGGACATAACCTCTGTCGCC
CTTCAGGAGGCGCGGAGGCTACTTGGTGGACTTTCGAGGACCAACCTCTGTCGCC
-----

Marijuana-C32096195
L.usitatissimum-LUS10013948
Textile-hemp-csa_locus_1853_iso_4_len_1208_ver_2
H.lupulus-HL.SW.V1.0.G020502.1
-----
-----CAGTAGCTCGAAGAATCAGG
ATCCACGCGCAAGAGGGTTACTATCATGCCAAGGACATCCAGCTCGCAAGCAGGATCAGA
ATTTCAGGAGGAGTACTACTATCATGCCAAGGATATCCAGTAGCTCGAAGAATCAGG
ATTTCAGGAGGAGGTTACCATTATCATGCCAAGGATATTCAGCTTCTCGAAGAATCAGG
***** **:*.***.*****.
-----

Marijuana-C32096195
L.usitatissimum-LUS10013948
Textile-hemp-csa_locus_1853_iso_4_len_1208_ver_2
H.lupulus-HL.SW.V1.0.G020502.1
-----
GGAGAGAGAGCTTAAGAAATGTAAACCTTCTTTATTTAATTAGGATCTTTACCAATAAC
GGCGAGCGGCTTAG-----
GGAGAGAGAGCTTAAGAAATGTAAACCTTCTTTATTTAATTAGGATCTTTACCAATAAC
GGCGAGAGAGCTTAA-----
**.*.*.*.*****.
-----

Marijuana-C32096195
L.usitatissimum-LUS10013948
Textile-hemp-csa_locus_1853_iso_4_len_1208_ver_2
H.lupulus-HL.SW.V1.0.G020502.1
-----
TT-----AGTAATCCAAGTAATATCTGTTGAAAACGAGTTTATA
-----
TTAAATCATAGGCTTGTGGAAGTAATCCAAGTAATATATGTTGAAAACGAGTTTATA
-----

Marijuana-C32096195
L.usitatissimum-LUS10013948
Textile-hemp-csa_locus_1853_iso_4_len_1208_ver_2
H.lupulus-HL.SW.V1.0.G020502.1
-----
GTGATACATTAGGTTAGTAAATGAGTCGAGTTCATTGTGAGAGGTTCTCTCTAAATCT
-----
GTGATACATCAAGTTAGTAAATGAGTCGAGTTCATTGTGAGAGGTTCTCTCTAAATCT
-----

Marijuana-C32096195
L.usitatissimum-LUS10013948
Textile-hemp-csa_locus_1853_iso_4_len_1208_ver_2
H.lupulus-HL.SW.V1.0.G020502.1
-----
ATCTTGTGTTCTTCAACAAATCTATAGAATCATGGTACGCCAGGATCAAGGTTTATGTC
-----
ATCTTGTGTTCTTCAACAAATCTATAGAATCATGGTACGCCAGGATCAAGGTTTATGTT
-----

Marijuana-C32096195
L.usitatissimum-LUS10013948
Textile-hemp-csa_locus_1853_iso_4_len_1208_ver_2
H.lupulus-HL.SW.V1.0.G020502.1
-----
GAAATCACTGAAATTAATTTGCAAACTACCGATGTTTCGCCGCTGAGATCGGGAAAGTT
-----
GAAATTAAGTAAATTAATTTGCAAACTACCGATGTTTCGCCGCTGAGATCGGGAAAGTT
-----

Marijuana-C32096195
L.usitatissimum-LUS10013948
Textile-hemp-csa_locus_1853_iso_4_len_1208_ver_2
H.lupulus-HL.SW.V1.0.G020502.1
-----
ACCGTCCGAATTAGTGAGGTTGAGACCCATTGGGAAGAATGTGGATATCTGAATCTCA
-----
ACCGTCCGAATTAGTGAGGTTGAGACCCATTGGGAAGAATGTGGATATCTGAATCTCA
-----

Marijuana-C32096195
L.usitatissimum-LUS10013948
Textile-hemp-csa_locus_1853_iso_4_len_1208_ver_2
H.lupulus-HL.SW.V1.0.G020502.1
-----
TCCAATT-----GTGACGGTAACCTTCTGATCTTGGCGCGGAAA
-----
TCCAATTGGGTTCCACCTCAGTGGTGTGACGGTAACCTTCTGATCTTGGCGCGGAAA
-----

```

```
Marijuana-C32096195
L.usitatissimum-LUS10013948
Textile-hemp-csa_locus_1853_iso_4_len_1208_ver_2
H.lupulus-HL.SW.V1.0.G020502.1
-----
CATCGGTGGTTTGA AAAATTTAATTTTCAGTGATTTTCGATATAAACTATGATCGGTGTCCAC
-----
CATCGGTGGTTTGA AAAATTTAATTTTCAGTAATTTTGATATAAACTATGATCGGTGTCTAC
-----

Marijuana-C32096195
L.usitatissimum-LUS10013948
Textile-hemp-csa_locus_1853_iso_4_len_1208_ver_2
H.lupulus-HL.SW.V1.0.G020502.1
-----
ATGATTTCTATAGATTTGTTGAAGAAATAGGGGATAGATTTTCGAGATAAACCTCCCCCAGC
-----
ATGATTTCTATAGATTTGTTGAAGAAATAGGAGATAGATTTTCGAGATAAACCTCCCCCAGC
-----

Marijuana-C32096195
L.usitatissimum-LUS10013948
Textile-hemp-csa_locus_1853_iso_4_len_1208_ver_2
H.lupulus-HL.SW.V1.0.G020502.1
-----
GAATCAACTTGACTCATTTTGTAACTGATGTATCACTATAGGCTCGTTTTCAACAGCA
-----
GAATCAACTTGGCTCATTTTGTAACTGATGTATCACTATAGGCTCGTTTTCAACAGCA
-----

Marijuana-C32096195
L.usitatissimum-LUS10013948
Textile-hemp-csa_locus_1853_iso_4_len_1208_ver_2
H.lupulus-HL.SW.V1.0.G020502.1
-----
ATATTACATGATTATTTTTTACAGCGCCTATGATTTTGGGTATTTGGTCGGTGTCTTGT
-----
ATATTACATGATT-----ATTGCGCCTATGATTTTGGGTATTTGGTCGGTGTCTTGT
-----

Marijuana-C32096195
L.usitatissimum-LUS10013948
Textile-hemp-csa_locus_1853_iso_4_len_1208_ver_2
H.lupulus-HL.SW.V1.0.G020502.1
-----
CTGTTTTTGTATCCCTTTGTGGGCAATAGTTGTTTCATATCTGTTTAAAAATCTAATGAGAA
-----
CTGTTTTTGTATCCCTTTGTGGGCAATAGTTGTTTCATATCTGTTTAAAAATCTAATGAGAA
-----

Marijuana-C32096195
L.usitatissimum-LUS10013948
Textile-hemp-csa_locus_1853_iso_4_len_1208_ver_2
H.lupulus-HL.SW.V1.0.G020502.1
-----
TGTTAGTTATAGCTATTAAGCTTCAAATCATATCTTGTTTGGTTAGCAGCTCTACTTAAA
-----
TGTTAGTTATAGCTATTAAGCTTCAAAAAA-----
-----

Marijuana-C32096195
L.usitatissimum-LUS10013948
Textile-hemp-csa_locus_1853_iso_4_len_1208_ver_2
H.lupulus-HL.SW.V1.0.G020502.1
-----
CAAATACATTTTAAACCTAATATTTGTTGGTAATCAAACGACAATTGAGCTTTTATGAGA
-----
-----

Marijuana-C32096195
L.usitatissimum-LUS10013948
Textile-hemp-csa_locus_1853_iso_4_len_1208_ver_2
H.lupulus-HL.SW.V1.0.G020502.1
-----
TTCTGGC
-----
-----
-----
```

EF2

|                                                                                                                                         |                                                                                                                                                                                                                                                                                                                       |
|-----------------------------------------------------------------------------------------------------------------------------------------|-----------------------------------------------------------------------------------------------------------------------------------------------------------------------------------------------------------------------------------------------------------------------------------------------------------------------|
| Textile-hemp-csa_locus_674_iso_1_len_2081_ver_2<br>Marijuana-C32108059<br>L.usitatissimum-Lus10031201<br>H.lupulus-HL.SW.v1.0.G039978.1 | AAAGATATAAACGATTACTCTATGAATGAAGTTAAAGAAAATATCTTTATGTTATGTAA<br>-----<br>-----                                                                                                                                                                                                                                         |
| Textile-hemp-csa_locus_674_iso_1_len_2081_ver_2<br>Marijuana-C32108059<br>L.usitatissimum-Lus10031201<br>H.lupulus-HL.SW.v1.0.G039978.1 | CCATAATTAGAAAATCTGTAAGAACACCCCAACACAATAACAACAACAAATAGCATAA<br>-----<br>-----                                                                                                                                                                                                                                          |
| Textile-hemp-csa_locus_674_iso_1_len_2081_ver_2<br>Marijuana-C32108059<br>L.usitatissimum-Lus10031201<br>H.lupulus-HL.SW.v1.0.G039978.1 | GTTATTGACCTTTTTGGGAGTTTTTCATCTTGAGACTGAGGTTGAGAAAGATGAGTGGTGT<br>-----<br>-----                                                                                                                                                                                                                                       |
| Textile-hemp-csa_locus_674_iso_1_len_2081_ver_2<br>Marijuana-C32108059<br>L.usitatissimum-Lus10031201<br>H.lupulus-HL.SW.v1.0.G039978.1 | AGCTTTTGATTCTCAAGGAGATGAGAAGACTTGAGAGAAATGCCTAGGAGAGGTAACAGCT<br>-----<br>-----                                                                                                                                                                                                                                       |
| Textile-hemp-csa_locus_674_iso_1_len_2081_ver_2<br>Marijuana-C32108059<br>L.usitatissimum-Lus10031201<br>H.lupulus-HL.SW.v1.0.G039978.1 | AAGACCAATAGAACTAGCTTTGTTGGCGAGGCAACGGCTGCACCGGTGAGGCTGGCAA<br>-----<br>-----                                                                                                                                                                                                                                          |
| Textile-hemp-csa_locus_674_iso_1_len_2081_ver_2<br>Marijuana-C32108059<br>L.usitatissimum-Lus10031201<br>H.lupulus-HL.SW.v1.0.G039978.1 | TGGATGTGTTCTGCAAAATCATAGGAACACATCCAATCACAGTAGGCAGCAGAAAATCAA<br>-----<br>-----                                                                                                                                                                                                                                        |
| Textile-hemp-csa_locus_674_iso_1_len_2081_ver_2<br>Marijuana-C32108059<br>L.usitatissimum-Lus10031201<br>H.lupulus-HL.SW.v1.0.G039978.1 | CAAGAAAAGACTATGAAATGCAAGAGAAAATCGGCAAAAAGCAAGGGAAAACAAGATG<br>-----<br>-----                                                                                                                                                                                                                                          |
| Textile-hemp-csa_locus_674_iso_1_len_2081_ver_2<br>Marijuana-C32108059<br>L.usitatissimum-Lus10031201<br>H.lupulus-HL.SW.v1.0.G039978.1 | CTGAGCCTCTAACTCTAAGCTTACTCTTTTTCTCTCTTTTGAGCCTCTCTCTCAGGTG<br>-----<br>-----                                                                                                                                                                                                                                          |
| Textile-hemp-csa_locus_674_iso_1_len_2081_ver_2<br>Marijuana-C32108059<br>L.usitatissimum-Lus10031201<br>H.lupulus-HL.SW.v1.0.G039978.1 | TAATACTTTGTTGGTGATACTCAAAACTAGTCAAGATGGTAAATTCACAGCAGAGGA<br>-----<br>-----ATGGTGAAGTTCACAGCTGAAGA                                                                                                                                                                                                                    |
| Textile-hemp-csa_locus_674_iso_1_len_2081_ver_2<br>Marijuana-C32108059<br>L.usitatissimum-Lus10031201<br>H.lupulus-HL.SW.v1.0.G039978.1 | ATTGAGAAGAATTATGGACAACAAGCACAATATACGGAATATGCCGTTATGCCCATGT<br>-----<br>-----GCTTCGTCGTATTATGGACTACAAGCACAACATCCGTAATATGTCGCTATTGCCCATGT                                                                                                                                                                               |
| Textile-hemp-csa_locus_674_iso_1_len_2081_ver_2<br>Marijuana-C32108059<br>L.usitatissimum-Lus10031201<br>H.lupulus-HL.SW.v1.0.G039978.1 | TGATCATGAAAAACTCACTCTTACCATTCTCTGGTGGCTGCTGGTATCATTTGCTCA<br>-----<br>-----GAAAACTCACTCTTACCATTCTCTGGTGGCTGCTGGTATCATTTGCTCA<br>TGATCAGGGGAAATCTACACTTACTGATTCTCTAGTGGCTGCTGGGTTATCATTTGCCCA<br>-----                                                                                                                 |
| Textile-hemp-csa_locus_674_iso_1_len_2081_ver_2<br>Marijuana-C32108059<br>L.usitatissimum-Lus10031201<br>H.lupulus-HL.SW.v1.0.G039978.1 | AGAAGTTGCTGGTGATGTCGGATGACTGATACTCGTCAGGATGAGGCAGAACGTTGGCAT<br>AGAAGTTGCTGGTGATGTCGGATGACTGATACTCGTCAGGATGAGGCAGAACGTTGGCAT<br>AGAGTTGCTGGGATGTCGGATGACTGATACCCGTCTGATGAAGCAGAGCTGGTAT<br>-----<br>-----AT<br>**                                                                                                     |
| Textile-hemp-csa_locus_674_iso_1_len_2081_ver_2<br>Marijuana-C32108059<br>L.usitatissimum-Lus10031201<br>H.lupulus-HL.SW.v1.0.G039978.1 | TACAATTAAGTCTACTGGTATCTCTCTCTATTATGAGATGTCGTGAATCTCTGAAGAG<br>TACAATTAAGTCTACTGGTATCTCTCTCTATTATGAGATGTCGTGAATCTCTGAAGAG<br>TACAATCAAGTCTACTGGAATCTCTTTTCTATCAGATGACTGATGAGACATCAAGAG<br>TACAATTAAGTCCACGGGATCTCTCTCTATTATGAGATGTCGTGAATCTCTGAAGAG<br>***** ***** * *:***** *: ** *****:*****.: . * *****             |
| Textile-hemp-csa_locus_674_iso_1_len_2081_ver_2<br>Marijuana-C32108059<br>L.usitatissimum-Lus10031201<br>H.lupulus-HL.SW.v1.0.G039978.1 | TTACGAAGGAAAGCGACAAGGGAATGAGTACCTCATCAATCTCATGACTCACCTGGGCA<br>TTACGAAGGAAAGCGACAAGGGAATGAGTACCTCATCAATCTCATGACTCACCTGGGCA<br>TTACCGGGAAAGGGGACGGGAGTGAATACCTCATCAATCTCATGACTCACCTGGGCA<br>TTATAAAGGAGAGAGACAAGGGAATGAGTACCTCATCAATCTCATGACTCACCTGGGCA<br>*** . . . ** . . . * . ***** ***** ***** * * . *****        |
| Textile-hemp-csa_locus_674_iso_1_len_2081_ver_2<br>Marijuana-C32108059<br>L.usitatissimum-Lus10031201<br>H.lupulus-HL.SW.v1.0.G039978.1 | TGTTGACCTTTTTCATCAGAAGTCACTGCTGCTCTTCGCATCACTGATGGTGCATTTGGT<br>TGTTGACCTTTTTCATCAGAAGTCACTGCTGCTCTTCGCATCACTGATGGTGCATTTGGT<br>CGTTGACTTCTCATCTGAAGTCACTGCTGCTCTCCGATCACTGATGGTGCATTTGGT<br>TGTTGACTTCTCATCAGAAGTCACTGCTGCTCTTCGCATCACTGATGGTGCATTTGGT<br>***** ***** .***** ***** * * ***** *****:***** **          |
| Textile-hemp-csa_locus_674_iso_1_len_2081_ver_2<br>Marijuana-C32108059<br>L.usitatissimum-Lus10031201<br>H.lupulus-HL.SW.v1.0.G039978.1 | TGTTGATTGTATTGAGGGTGTCTGTGTCCAACAGAGACTGTGCTTCGTCAAGCCCTTGG<br>TGTTGATTGTATTGAGGGTGTCTGTGTCCAACAGAGACTGTGCTTCGTCAAGCCCTTGG<br>CGTGATTTGTTGAGGGGCTCTGGGTGACAGACTGAGACTGTTTCTTCGTCAAGCTTTGGG<br>GGTTGATTGTATTGAGGGTGTGTGTGTCCAACAGAACTGTGCTCCGTCAAGCCCTTGG<br>* * ***** ***** * * * * * . . . * * ***** * * * * *       |
| Textile-hemp-csa_locus_674_iso_1_len_2081_ver_2<br>Marijuana-C32108059<br>L.usitatissimum-Lus10031201<br>H.lupulus-HL.SW.v1.0.G039978.1 | TGAAAGGATTAGCCCTGTGTTAACTGTTAAACAAGATGGACAGGTGTTTTCTTGAGCTGCA<br>TGAAAGGATTAGCCCTGTGTTAACTGTTAAACAAGATGGACAGGTGTTTTCTTGAGCTGCA<br>TGAAAGGATTAGCCCTGTGTTAACTGTTAAACAAGATGGACAGGTGTTTTCTTGAGCTGCA<br>TGAAAGGATTAGCCCTGTGTTAACTGTTAAACAAGATGGACAGGTGTTTTCTTGAGCTGCA<br>***** ***** * * * * * ***** ***** ***** * * * * * |



```
H. lupulus-HL.SW.v1.0.G039978.1      GAAACGTTTAGCTAAGTCAGATCCTATGGTGGTGTGTTCTA-----
***** * ** ***** ** ** ***** ** ** ** **

Textile-hemp-csa_locus_674_iso_1_len_2081_ver_2
Marijuana-C32108059
L.usitatissimum-Lus10031201
H.lupulus-HL.SW.v1.0.G039978.1      CATCATTGCTGGTGTCTGGAGAGCTTCACCTTGAATCTGTTGAAGGATCTTGTGGATGA
-----

Textile-hemp-csa_locus_674_iso_1_len_2081_ver_2
Marijuana-C32108059
L.usitatissimum-Lus10031201
H.lupulus-HL.SW.v1.0.G039978.1      CTTTCATGGGTGGTGTCTGAGATCACGAAATCCGACCCAGTTGTCTTCCGTGAAACCGT
-----

Textile-hemp-csa_locus_674_iso_1_len_2081_ver_2
Marijuana-C32108059
L.usitatissimum-Lus10031201
H.lupulus-HL.SW.v1.0.G039978.1      CCTTGAGAAATCAAGCAGAGTCGTTCATGAGCAAGTCCCCCAACAAGCATAACCGTCTCTA
-----

Textile-hemp-csa_locus_674_iso_1_len_2081_ver_2
Marijuana-C32108059
L.usitatissimum-Lus10031201
H.lupulus-HL.SW.v1.0.G039978.1      CATGGAGCCAGACCATTGGAGGAAGGATTAGCTGAGGCAATCGATGATGGCCGATTG
-----

Textile-hemp-csa_locus_674_iso_1_len_2081_ver_2
Marijuana-C32108059
L.usitatissimum-Lus10031201
H.lupulus-HL.SW.v1.0.G039978.1      CCCAAGGGATGACCCCAAGGTCCGTTCCAAGATCCTCTGAGGAGTTCCGCTGGGACAA
-----

Textile-hemp-csa_locus_674_iso_1_len_2081_ver_2
Marijuana-C32108059
L.usitatissimum-Lus10031201
H.lupulus-HL.SW.v1.0.G039978.1      GGATCTCGCCAAGAAGATCTGGTGTCTCGGTCCCAGACCCCGCCCTAACATGGTAGT
-----

Textile-hemp-csa_locus_674_iso_1_len_2081_ver_2
Marijuana-C32108059
L.usitatissimum-Lus10031201
H.lupulus-HL.SW.v1.0.G039978.1      GGACATGTGTAAGGGAGTTCACTACCTGAATGAAATCAAGGATTCAAGTGGTGGGTT
-----

Textile-hemp-csa_locus_674_iso_1_len_2081_ver_2
Marijuana-C32108059
L.usitatissimum-Lus10031201
H.lupulus-HL.SW.v1.0.G039978.1      CCAGTGGGCATCAAAGGAAGGTGCGCTTGCAGAAGAAAACATGAGAGGAATCTGCTTCGA
-----

Textile-hemp-csa_locus_674_iso_1_len_2081_ver_2
Marijuana-C32108059
L.usitatissimum-Lus10031201
H.lupulus-HL.SW.v1.0.G039978.1      AGTCTGTGATGTGGTTCTCCACGCCGATGCTATCCACAGAGTGGTGGTCAAGTCATCCC
-----

Textile-hemp-csa_locus_674_iso_1_len_2081_ver_2
Marijuana-C32108059
L.usitatissimum-Lus10031201
H.lupulus-HL.SW.v1.0.G039978.1      AACAGCCAGGAGGGTCATCTACGCTTCCCCACTGTCTGCCAGCCAAGGCTGGTCGAGCC
-----

Textile-hemp-csa_locus_674_iso_1_len_2081_ver_2
Marijuana-C32108059
L.usitatissimum-Lus10031201
H.lupulus-HL.SW.v1.0.G039978.1      TTGCTACCCCTCGCGGNNNNNNNNNNNNNNNNNNNNNNNNNNNNNNNNNNNNNNNNNNNN
-----

Textile-hemp-csa_locus_674_iso_1_len_2081_ver_2
Marijuana-C32108059
L.usitatissimum-Lus10031201
H.lupulus-HL.SW.v1.0.G039978.1      NNNNNNNNNNNNNNNNNNNNNNNNNNNNNNNNNNNNNNNNNNNNNNNNNNNNNNNNNNN
-----

Textile-hemp-csa_locus_674_iso_1_len_2081_ver_2
Marijuana-C32108059
L.usitatissimum-Lus10031201
H.lupulus-HL.SW.v1.0.G039978.1      NNNNNNNNNNNNNNNNAAGAGGAAGGTTTGAAGGAGCAGATGACCCCTCTCCGATT
-----

Textile-hemp-csa_locus_674_iso_1_len_2081_ver_2
Marijuana-C32108059
L.usitatissimum-Lus10031201
H.lupulus-HL.SW.v1.0.G039978.1      TCGAGGACAAGCTGTAAGAGCATCTTTGGTCTTTGCTGCAGGAGATGGATGATCCTAGT
-----

Textile-hemp-csa_locus_674_iso_1_len_2081_ver_2
Marijuana-C32108059
L.usitatissimum-Lus10031201
H.lupulus-HL.SW.v1.0.G039978.1      TATGTTTTTTTTTATACTGATGTTGTGCTGTGGTTTGAGTCCATTATGTTA
-----
```

**Actin**

```

L.usitatissimum-Lus10001694
Textile-hemp-csa_locus_2263_iso_5_len_1488_ver_2
Marijuana-scaffold122787
H.lupulus-HL.SW.v1.0.G017631.1
-----
-----CTTCTCTCTCTCAAACCTCTA---AACTCTAAACCATTCATCTTTTCATT
TGTTGCATTCCTTAGTATCATTTGT-ATCGCTATATGACGATCTACCCGCTTTT--ATTTATT

L.usitatissimum-Lus10001694
Textile-hemp-csa_locus_2263_iso_5_len_1488_ver_2
Marijuana-scaffold122787
H.lupulus-HL.SW.v1.0.G017631.1
-----
CATTTACCACAAACCTCTAAACTTCCATCTTGTCTTTTCGCATTTCAACAGGTAAGTGAA
ATTTTATGAA-----AGATGTTCTTACAGCATAG-TTTGGTGAACAAATAGTAAAGTAA

L.usitatissimum-Lus10001694
Textile-hemp-csa_locus_2263_iso_5_len_1488_ver_2
Marijuana-scaffold122787
H.lupulus-HL.SW.v1.0.G017631.1
-----
-ATGGCAGAAGGTGAGGATATCCAGCCCCCTCGTCTGCGCAATGGAACAGGAATGGTCA-
GATGGCAGATGCAGAGGATATTCAGCCACTTGTCTGCGATAATGGAACAGGAATGGTCA-
GATGGCAGATGCAGAGGATATTCAGCCACTTGTCTGCGATAATGGAACAGGAATGGTCAA
-----

L.usitatissimum-Lus10001694
Textile-hemp-csa_locus_2263_iso_5_len_1488_ver_2
Marijuana-scaffold122787
H.lupulus-HL.SW.v1.0.G017631.1
-----
GGTATTAATGTTTATTTGTCTTGTGTTTAAAGTTTCCCATGGAATCATTATCTTCTGTGC
-----

L.usitatissimum-Lus10001694
Textile-hemp-csa_locus_2263_iso_5_len_1488_ver_2
Marijuana-scaffold122787
H.lupulus-HL.SW.v1.0.G017631.1
-----
AAAAGCTAGCTTAATGTTACTCGTGGGTGTGTAGAAATTTGCCTCTTGACCATGAATATT
-----

L.usitatissimum-Lus10001694
Textile-hemp-csa_locus_2263_iso_5_len_1488_ver_2
Marijuana-scaffold122787
H.lupulus-HL.SW.v1.0.G017631.1
-----
-----AGGCTGGATTGCTGGAGATGATGCCCTCGTGTGTGTTCCCCA
-----AGCTGGGTTTGTGGAGATGATGCTCCACGAGCTGTGTTCCCCA
GTGATCTTACCTATTAGGCTGGGTTTGTGGAGATGATGCTCCACGAGCTGTGTTCCCCA

L.usitatissimum-Lus10001694
Textile-hemp-csa_locus_2263_iso_5_len_1488_ver_2
Marijuana-scaffold122787
H.lupulus-HL.SW.v1.0.G017631.1
-----
GTATTGTTGGTCTGCCACGTACACTGGCGTATGGTTGGAATGGGTGAGAAAGATGCCT
GTATCGTGGTCTGCTCCTCGTACACTGGTGAATGGTTGGAATGGGCCAGAAAGACGCAT
GTATCGTGGTCTGCTCCTCGTACACTGGTGAATGGTTGGAATGGGCCAGAAAGACGCAT
-----

L.usitatissimum-Lus10001694
Textile-hemp-csa_locus_2263_iso_5_len_1488_ver_2
Marijuana-scaffold122787
H.lupulus-HL.SW.v1.0.G017631.1
-----
ATGTTGGTGTGAGCCAGTCCAAGAGAGGTATTTGACATGAAATACCAATGAAAC
ATGTTGGTGTGAGGCACAATCCAAGCAGGTATCTTAACTCTGAAGTACCAATGAGC
ACGTGGTGTGAGGCACAATCCAAGCAGGTATCTTAACTCTGAAGTACCAATGAGC
-----

L.usitatissimum-Lus10001694
Textile-hemp-csa_locus_2263_iso_5_len_1488_ver_2
Marijuana-scaffold122787
H.lupulus-HL.SW.v1.0.G017631.1
-----
ATGTTATTGTGAACAATTGGGATGACATGGAAAAGATTTGGCATCACACCTTCTACAACG
ATGGTATTGTGAGCAACTGGGATGACATGGAAAAGATCTGGCATCACACTTTTACAATG
ATGTTATTGTGAGCAACTGGGATGACATGGAAAAGATCTGGCATCACACTTTTACAATG
-----

L.usitatissimum-Lus10001694
Textile-hemp-csa_locus_2263_iso_5_len_1488_ver_2
Marijuana-scaffold122787
H.lupulus-HL.SW.v1.0.G017631.1
-----
AGCTTCGTGTGCTCCGGAAGAGCACCCCTGTTCTTCTGACTGAGGCTCCTCTGAACCCCA
AGCTTCGTGTGCTCCCTGAGGAACACCCCGTTCTTCTAAACCGAAGCTCCACTTAACCCCA
AGCTTCGTGTGCTCCCTGAGGAACACCCCGTTCTTCTAAACCGAAGCTCCACTTAACCCCA
-----

L.usitatissimum-Lus10001694
Textile-hemp-csa_locus_2263_iso_5_len_1488_ver_2
Marijuana-scaffold122787
H.lupulus-HL.SW.v1.0.G017631.1
-----
AGGCAATCGTGAGAAGATGACCCAGATCATGTTGAGACCTTCAATACCCCTGCATGT
AGGCCAATCGTGAAAAATGACCCAGATCATGTTGAGACCTTCAACACCCCTGCTATGT
AGGCCAATCGTGAAAAATGACCCAGATCATGTTGAGACCTTCAACACTCTGCTATGT
-----

L.usitatissimum-Lus10001694
Textile-hemp-csa_locus_2263_iso_5_len_1488_ver_2
Marijuana-scaffold122787
H.lupulus-HL.SW.v1.0.G017631.1
-----
ATGTTGCTATTTCAGGCTGTATTGTCACTGTATGCCAGTGGTCTGACAACTGGT-----
ATGTTGCCATTCAAGCCGTTCTTCTCTGTATGCCAGTGGTCTGACTACCGGT-----
ATGTTGCCATTCAAGCTGTTCTTCTCTGTATGCCAGTGGTCTGACTACCGGTGAGTACC
-----

L.usitatissimum-Lus10001694
Textile-hemp-csa_locus_2263_iso_5_len_1488_ver_2
Marijuana-scaffold122787
H.lupulus-HL.SW.v1.0.G017631.1
-----
AAGTACTTTCTTTCTCTTTTCATTGTCTGATGATGATTTCTTGTGAGATATCCTATA
-----

L.usitatissimum-Lus10001694
Textile-hemp-csa_locus_2263_iso_5_len_1488_ver_2
Marijuana-scaffold122787
H.lupulus-HL.SW.v1.0.G017631.1
-----
GATACTGAAATGAGTCTTTAAATATGGTAAGAACTGAGATTTTACTAATACCAATCTCAT
-----

L.usitatissimum-Lus10001694
Textile-hemp-csa_locus_2263_iso_5_len_1488_ver_2
Marijuana-scaffold122787
H.lupulus-HL.SW.v1.0.G017631.1
-----
TCTGTTTACCAGCTACTTGCATCATGATATGATAGTTTCTTACCTTGTCAAATATTGTAG
-----

L.usitatissimum-Lus10001694
Textile-hemp-csa_locus_2263_iso_5_len_1488_ver_2
Marijuana-scaffold122787
H.lupulus-HL.SW.v1.0.G017631.1
-----
TGTGGCTTTGGTTTGGAAATTATATTTTCTTGAAGTTTAAACCTTGACCCTCATTTTC
-----

L.usitatissimum-Lus10001694
Textile-hemp-csa_locus_2263_iso_5_len_1488_ver_2
Marijuana-scaffold122787
H.lupulus-HL.SW.v1.0.G017631.1
-----
TAATACTATTATGAGCTTTTATATGCCCCTGTCTTAAATAAATTTAGCTAGAAGTTTTG
-----

```



L.usitatissimum-Lus10001694  
Textile-hemp-csa\_locus\_2263\_iso\_5\_len\_1488\_ver\_2  
Marijuana-scaffold122787  
H.lupulus-HL.SW.v1.0.G017631.1  
-----ATCGTGTAGATTCTGGTATGGTGTAGCCACACAGTCCCCTAT  
-----ATTGTGTGGATTCTGGTATGGTGTAAAGCATACTGTCCTCAT  
CCTTAGTTTTGCAGGATTTGTGCTGGATTCTGGTATGGTGTAAAGCATACTGTCCTCAT  
-----GGTATTGTGTGGACTCTGGTATGGTGTAGCCATACTGTCCTCAT  
\*\* \*\* \*\* \*\* \*\* \*\* \*\* \*\* \*\* \*\* \*\* \*\* \*\* \*\* \*\* \*\* \*\* \*\* \*\* \*\* \*\* \*\* \*\* \*\* \*\* \*\* \*\* \*\* \*\* \*\* \*\* \*\* \*\* \*\* \*\* \*\* \*\* \*\* \*\* \*\* \*\* \*\* \*\*

L.usitatissimum-Lus10001694  
Textile-hemp-csa\_locus\_2263\_iso\_5\_len\_1488\_ver\_2  
Marijuana-scaffold122787  
H.lupulus-HL.SW.v1.0.G017631.1  
CTACGAGGGTTACGCTCTCCCTCATGCCATCCTTCGCTCGACCCTTGTGGGGCTGACCT  
ATACGAGGGATATGCTCTCCCTCATGCCATTCTACGCTCTGATCTTGTGGTCTGATCTCT  
ATACGAGGGTATGCTCTCCCTCATGCCATTCTACGCTCTGATCTTGTGGTCTGATCTCT  
ATACGAGGGATATGCCCTCCCTCATGCCATTCTCCGCTCTGACCCTTGTGGTCTGATCTCT  
.\*\*\*\*\* \*\* \*\* \*\* \*\* \*\* \*\* \*\* \*\* \*\* \*\* \*\* \*\* \*\* \*\* \*\* \*\* \*\* \*\* \*\* \*\* \*\* \*\* \*\* \*\*

L.usitatissimum-Lus10001694  
Textile-hemp-csa\_locus\_2263\_iso\_5\_len\_1488\_ver\_2  
Marijuana-scaffold122787  
H.lupulus-HL.SW.v1.0.G017631.1  
TACAGATAGCTTAATGAAGATCCTCACCGAGCGGGGTTATTCTTTTACCACACTACAGCAGA  
TACTGATCACCTAATGAAGATCCTCACCGAGCGTGGATACTCCTTACCACCACTGCTGA  
TACTGATCACCTAATGAAGATCCTCACCGAGCGTGGATACTCCTTACCACCACTGCTGA  
TACTGATCACCTAATGAAGATCCTTACTGAGCGTGGTACTCCTTACCACCACTGCTGA  
\*\*\*.\*\*\*. \* \*\*\*\*\* \*\* \*\* \*\* \*\* \*\* \*\* \*\* \*\* \*\* \*\* \*\* \*\* \*\* \*\* \*\* \*\* \*\* \*\* \*\* \*\* \*\* \*\* \*\* \*\* \*\* \*\* \*\* \*\* \*\* \*\* \*\*

L.usitatissimum-Lus10001694  
Textile-hemp-csa\_locus\_2263\_iso\_5\_len\_1488\_ver\_2  
Marijuana-scaffold122787  
H.lupulus-HL.SW.v1.0.G017631.1  
ACGGGAAATTTGTGAGGGACATGAAAGAAAAGCTAGCTTACATCGCTCTCGA CTTTGAGCA  
ACGGGAAATTTGTGAGGGACATGAAGGAGAAGCTTGCCTACATAGCTCTTGA CTTTGAGCA  
ACGGGAAATTTGTGAGGGACATGAAGGAGAAGCTTGCCTACATAGCTCTTGA CTTTGAGCA  
ACGGGAAATTTGTGAGGGACATGAAGGAGAACTTGTCTACATGCTCTTGA CTTTGAGCA  
\*\*\*\*\* \*\* \*\* \*\* \*\* \*\* \*\* \*\* \*\* \*\* \*\* \*\* \*\* \*\* \*\* \*\* \*\* \*\* \*\* \*\* \*\* \*\* \*\* \*\* \*\* \*\* \*\* \*\* \*\* \*\* \*\* \*\*

L.usitatissimum-Lus10001694  
Textile-hemp-csa\_locus\_2263\_iso\_5\_len\_1488\_ver\_2  
Marijuana-scaffold122787  
H.lupulus-HL.SW.v1.0.G017631.1  
GGAAATGGAAACAGCCAAACTAGCTCATCTCTCGAGAAGATTACGAATTCCTGTATGG  
GGAGATGGAGACAGCCAAAGACTAGTTCTGCTGTTGAGAAGATTATGAGTTGCCAGACGG  
GGAGATGGAGACAGCCAAAGACTAGTTCTGCTGTTGAGAAGATTATGAGTTGCCAGACGG  
GGAGATGGAGACAGCCAAAGACTAGTTCTGCTGTTGAGAAGATTATGAGTTGCCAGATGG  
\*\*\*.\*\*\*. \* \*\*\*\*\* \*\* \*\* \*\*~\*\*~\*\*~\*\*~\*\*~\*\*~\*\*~\*\*~\*\*~\*\*~\*\*~\*\*~\*\*~\*\*~\*\*~\*\*~\*\*~

L.usitatissimum-Lus10001694  
Textile-hemp-csa\_locus\_2263\_iso\_5\_len\_1488\_ver\_2  
Marijuana-scaffold122787  
H.lupulus-HL.SW.v1.0.G017631.1  
ACAGGTCATCACCATTAGGTGCTGAGCGTTTCCGTTGCCGGAAGTCTGTTCCAACCATC  
GCAAGTCATCACCATTAGGTGCGGAGCGGATTCGATGCTCTGAAAGTTCTTTCCAACCTTC  
GCAAGTCATCACCATTAGGTGCGGAGCGGATTCGATGCTCTGAAAGTTCTTTCCAACCTTC  
GCAAGTCATCACCATTAGGTGCTGAGCGGATTCGATGCTCTGAAAGTTCTTTCCAACCTTC  
.\*\*\*\*\* \*\* \*\* \*\*~\*\*~\*\*~\*\*~\*\*~\*\*~\*\*~\*\*~\*\*~\*\*~\*\*~\*\*~\*\*~\*\*~\*\*~\*\*~\*\*~

L.usitatissimum-Lus10001694  
Textile-hemp-csa\_locus\_2263\_iso\_5\_len\_1488\_ver\_2  
Marijuana-scaffold122787  
H.lupulus-HL.SW.v1.0.G017631.1  
CATGATAGGAATGGAAGCTGCAGGATCCACGAGACAACTTACAATCCATCATGAAGTG  
ATTGGTTGAATGGAAGCAGCAGGCACTCACGAACTACTTACAACCTCCATCATGAAGTG  
ATTGGTTGAATGGAAGCAGCAGGCACTCACGAACTACTTACAACCTCCATCATGAAGTG  
ATTGGTTGAATGGAAGCAGCAGGCACTCACGAACTACTTACAACCTCAATCATGAAGTG  
.\*\*\*.\*\*\*.\*\*\*\*\* \*\* \*\* \*\*~\*\*~\*\*~\*\*~\*\*~\*\*~\*\*~\*\*~\*\*~\*\*~\*\*~\*\*~\*\*~\*\*~\*\*~\*\*~\*\*~

L.usitatissimum-Lus10001694  
Textile-hemp-csa\_locus\_2263\_iso\_5\_len\_1488\_ver\_2  
Marijuana-scaffold122787  
H.lupulus-HL.SW.v1.0.G017631.1  
CGACGTGGATATTAGGAAGGACTTGTACGGTAACATTGTGCTCAGTGGTGGTCAACTAT  
CGATGTTGATATCAGAAAGGATCTTTACGGTAACATTGTGCTCAGTGGTGGTCAACTAT  
CGATGTTGATATCAGAAAGGATCTTTACGGTAACATTGTGCTCAGTGGTGGTGGACCAT  
CGATGTTGATATCAGAAAGGATCTTTACGGTAACATTGTGCTCAGTGGTGGTGGACCAT  
\*\*\* \*\* \*\* \*\*~\*\*~\*\*~\*\*~\*\*~\*\*~\*\*~\*\*~\*\*~\*\*~\*\*~\*\*~\*\*~\*\*~\*\*~\*\*~\*\*~

L.usitatissimum-Lus10001694  
Textile-hemp-csa\_locus\_2263\_iso\_5\_len\_1488\_ver\_2  
Marijuana-scaffold122787  
H.lupulus-HL.SW.v1.0.G017631.1  
GTTCCCTGGTATTGCTGATAGAATGAGCAAAGAGATCTCTGCCCTTGTCCAAAGCAGCAT  
GTTCCAGGCATTTGCTGATAGGATGAGCAAAGGAAATCTCTGCTTGCACCAAGCTCTAT  
GTTCCAGGCATTTGCTGATAGGATGAGCAAAGGAAATCTCTGCTTGCACCAAGCTCTAT  
GTTCCAGGCATTTGCTGATAGAATGAGCAAAGGAAATCTCTGCTTGCACCAAGCTCGAT  
\*\*\*\*\* \*\* \*\* \*\*~\*\*~\*\*~\*\*~\*\*~\*\*~\*\*~\*\*~\*\*~\*\*~\*\*~\*\*~\*\*~\*\*~\*\*~\*\*~\*\*~

L.usitatissimum-Lus10001694  
Textile-hemp-csa\_locus\_2263\_iso\_5\_len\_1488\_ver\_2  
Marijuana-scaffold122787  
H.lupulus-HL.SW.v1.0.G017631.1  
GAAGATCAAGGTTGTTGCACCACCAGAAAGAAATACAGTGTGGATTGGCGGTTCCAT  
GAAGATTAAGGTTGTTGCACCACCAGAGAGAAATACAGTGTGGATTGGGCTCTAT  
GAAGATTAAGGTTGTTGCACCACCAGAGAGAAATACAGTGTGGATTGGAGGCTCCAT  
GAAGATCAAGGTTGTTGCACCACCAGAGAGAAATACAGTGTGGATTGGAGGCTCCAT  
\*\*\*\*\* \*\* \*\* \*\*~\*\*~\*\*~\*\*~\*\*~\*\*~\*\*~\*\*~\*\*~\*\*~\*\*~\*\*~\*\*~\*\*~\*\*~\*\*~\*\*~

L.usitatissimum-Lus10001694  
Textile-hemp-csa\_locus\_2263\_iso\_5\_len\_1488\_ver\_2  
Marijuana-scaffold122787  
H.lupulus-HL.SW.v1.0.G017631.1  
CTTAGCTTCGCTTAGCACCTTCCAGCAG-----  
TTGGCTTCACTCAGCACCTTCCAGCAG-----  
CTTGCCCTCTCTCAGCACCTTCCAGCAGGTTTATATTTTTTTCATATCTAAGTTTGGCAT  
TTTGGCCTCTCTCAGCACCTTCCAGCAG-----  
\*\* \*\* \*\* \*\* \*\* \*\* \*\* \*\* \*\* \*\* \*\* \*\*

L.usitatissimum-Lus10001694  
Textile-hemp-csa\_locus\_2263\_iso\_5\_len\_1488\_ver\_2  
Marijuana-scaffold122787  
H.lupulus-HL.SW.v1.0.G017631.1  
-----  
GATGATCTTAATATGATCATTTGAATAATTACTGATATCTTATTTTATCTTTTCTTATGC  
-----

L.usitatissimum-Lus10001694  
Textile-hemp-csa\_locus\_2263\_iso\_5\_len\_1488\_ver\_2  
Marijuana-scaffold122787  
H.lupulus-HL.SW.v1.0.G017631.1  
--ATGTGGATCGCAAAGCAGAGTACGATGAGTCTGGACCGTCAATTGTTTCACAGGAAGT  
--ATGTGGATTGCAAAGCAGAGTACGATGAGTCTGGGCCATCAATTGTTTCATAGGAAAT  
AGATGTGGATTGCAAAGCAGAGTACGACGAGTCTGGGCCATCAATTGTTTCATAGGAAAT

L.usitatissimum-Lus10001694  
Textile-hemp-csa\_locus\_2263\_iso\_5\_len\_1488\_ver\_2  
Marijuana-scaffold122787  
H.lupulus-HL.SW.v1.0.G017631.1  
GCTTCTGA-----  
GCTTCTAAGCATGTGAGAATTAGAACTACTGCAGAGAGAAAAGCAAGTACTGTTGTTTTG  
GCTTCTAAGCATGTGAGAATTAGAACTACTGCAGAGAGAAAAGCAAGTACTGTTGTTTTT  
-----

L.usitatissimum-Lus10001694  
Textile-hemp-csa\_locus\_2263\_iso\_5\_len\_1488\_ver\_2  
Marijuana-scaffold122787  
H.lupulus-HL.SW.v1.0.G017631.1  
-----  
ATTATGTTGGAGAAAAGTGTGTTTGCAGAAGGTTCAATCTAGCTCGTTACCTTTTTTTTT  
ATTATCTTGAGAAAAGTGTGTTTGCAGAAGGTTCAATCTAGCTCGTTACCTTTTTTTTT  
-----

L.usitatissimum-Lus10001694  
Textile-hemp-csa\_locus\_2263\_iso\_5\_len\_1488\_ver\_2  
Marijuana-scaffold122787  
H.lupulus-HL.SW.v1.0.G017631.1  
ATTCTCACTTGAAGTGACTTCGGAAGGCCAGGAGTTAATTTATCCAATTTGTTCTTTTT  
ATTCTCACTTGAAGTGACTTCGGAAGGCCAGGAGTTAATTTATCCAATTTGTTCTTTTT  
-----

L.usitatissimum-Lus10001694  
Textile-hemp-csa\_locus\_2263\_iso\_5\_len\_1488\_ver\_2  
Marijuana-scaffold122787  
H.lupulus-HL.SW.v1.0.G017631.1  
-----  
AAATTTTATTTTATTTTGTATTACGACTCTTTTATATCATATATATATTTTTTTTGG  
AAATTTTATTTTATTTTGTATTACAACTCTTTGATATCATATATATTTTTTTTGG  
-----

L.usitatissimum-Lus10001694  
Textile-hemp-csa\_locus\_2263\_iso\_5\_len\_1488\_ver\_2  
Marijuana-scaffold122787  
H.lupulus-HL.SW.v1.0.G017631.1  
-----  
TCAAAAAAAAAA  
TCA-----

H.lupulus-HL.SW.v1.0.G017631.1

-----

Cyclo

```

L.usitatissimum-Lus10042553
Marijuana-scaffold3694
Textile-hemp-csa_locus_6842_iso_2_len_854_ver_2
H.lupulus-HL.SW.v1.0.G028342.1
-----
AAAAAGTTTGTAGCTTAAATAAACCTTGAAGGAATATGAGTTCTCAATCTAATTAAC
-----

L.usitatissimum-Lus10042553
Marijuana-scaffold3694
Textile-hemp-csa_locus_6842_iso_2_len_854_ver_2
H.lupulus-HL.SW.v1.0.G028342.1
-----
GACTTCTCTTCAATGATGATGCTTTTATTATTATTATTAAGGATCTCTGAGTTGTTT
-----
-----TAAGGATCTCTGAGTTGTTT
-----
-----TATGGATCAATGAGTTGTTT
-----

L.usitatissimum-Lus10042553
Marijuana-scaffold3694
Textile-hemp-csa_locus_6842_iso_2_len_854_ver_2
H.lupulus-HL.SW.v1.0.G028342.1
-----
TGTGAGGATTAT-ATGGATTATCTTTTAGTTGACATTCCTTGATTTTGAACAGGAACCTT
TGTGAGGATTAT-ATGGATTATCTTTTAGTTGACATTCCTTGATTTTGAACAGGAACCTT
TCTGGGATTATATTTGATTAGCTTTTAGTTAACATTCCTTGGTTTTTGAACAGGAACCTG
-----

L.usitatissimum-Lus10042553
Marijuana-scaffold3694
Textile-hemp-csa_locus_6842_iso_2_len_854_ver_2
H.lupulus-HL.SW.v1.0.G028342.1
-----
-----ATGGCGAAGAATCC
TTCTTCTGAAAACCA-----AAATATCACAATTTGGTTTTCAACATGTCGAAACCC
TTCTTCTGAAAACCA-----AAATATCACAATTTGGTTTTCAACATGTCGAAACCC
TTCTTTTGGAAAGTTAAGTTAATAAAAAAATTTCAAATGGATTGACAAAATGCGAACC
*:.:.*.*** **

L.usitatissimum-Lus10042553
Marijuana-scaffold3694
Textile-hemp-csa_locus_6842_iso_2_len_854_ver_2
H.lupulus-HL.SW.v1.0.G028342.1
-----
AAAGGTCTTTTTCATGATTTGATAGGCAAGGTGAAAACCTGGCAGGTTGATGAGGCT
CAAGGTCTTCTTTGACATCCTTATTTGAAAGATGAAGGCTGGCCGAGTTGTAATGGAATT
CAAGGTCTTCTTTGACATCCTTATTTGAAAGATGAAGGCTGGCCGAGTTGTAATGGAATT
CAAGGTCTTCTTTGACATCCTTATTTGAAAGATGAAGGCTGGCCGAGTTGTAATGGAATT
***** ***** * **:*.*.*** **.*.*** **.*.*** **.*.*** **

L.usitatissimum-Lus10042553
Marijuana-scaffold3694
Textile-hemp-csa_locus_6842_iso_2_len_854_ver_2
H.lupulus-HL.SW.v1.0.G028342.1
-----
GTTTGCAGATACAGTCCCAAAAACAGCTGA GAATTTCCGAGCTCTATGCACGGGAGAGAA
GTTTGCAGATACAGTCCCAAAAACAGCTGA AAACCTTCCGAGCTCTATGCACGGGAGAGAA
GTTTGCAGATACAGTCCCAAAAACAGCTGA AAACCTTCCGAGCTCTATGCACGGGAGAGAA
GTTTGCAGATACAGTCCCAAAAACAGCTGA AAACCTTCCGAGCTCTATGCACGGGAGAGAA
***** **.*.:. **.*.*** **.*.*** **.*.*** **.*.*** **.*.*** **

L.usitatissimum-Lus10042553
Marijuana-scaffold3694
Textile-hemp-csa_locus_6842_iso_2_len_854_ver_2
H.lupulus-HL.SW.v1.0.G028342.1
-----
AGGGATTGGGAAAGCAGGGAAGCCTTTACATTACAGGGCTCGGCTTTCACCGTATAAT
AGGCTTTGGGGTATCAGGGAAGGCACTGCATTACAAGGCTCAGCCTTTCACAGGATCAT
AGGCTTTGGGGTATCAGGGAAGGCACTGCATTACAAGGCTCAGCCTTTCACAGGATCAT
AGGCTTTGGGGTATCAGGGAAGGCACTGCATTACAAGGCTCAGCCTTTCACAGGATCAT
**.*.*** **.*.*** **.*.*** **.*.*** **.*.*** **.*.*** **.*.*** **

L.usitatissimum-Lus10042553
Marijuana-scaffold3694
Textile-hemp-csa_locus_6842_iso_2_len_854_ver_2
H.lupulus-HL.SW.v1.0.G028342.1
-----
CCCCAATTTTCATGTCAGGTTGAGACTTTACCAGAGGAATGGAACCTGGTGGCGAATC
ACCAAACTTCATGTCAGGTTGAGACTTTACCAGAGGTAATGGGACCGGTGGAGAGTCC
ACCAAACTTCATGTCAGGTTGAGACTTTACCAGAGGTAATGGGACCGGTGGAGAGTCC
CCCCAATTTTCATGTCAGGTTGAGACTTTACCAGAGGTAATGGAACCTGGGAGAGTCC
**.*.*** ***** **.*.*** **.*.*** **.*.*** **.*.*** **.*.*** **

L.usitatissimum-Lus10042553
Marijuana-scaffold3694
Textile-hemp-csa_locus_6842_iso_2_len_854_ver_2
H.lupulus-HL.SW.v1.0.G028342.1
-----
AATCTATGGGGAGAAGTTTGCAGATGAGAACTTCAAGCTGAAGCACACGGGCTCTGGGAT
AATTTATGGTATGAAGTTTGGAGGATGAGAACTTCAAGTTGAAGCACACTGGCCCTGGAA
AATTTATGGTATGAAGTTTGGAGGATGAGAACTTCAAGTTGAAGCACACTGGCCCTGGAA
TATTTATGGTATGAAGTTTGGAGGATGAGAACTTCAAGCTGAAGCACACTGGCCCTGGAT
:* **.*.*** **.*.*** **.*.*** **.*.*** **.*.*** **.*.*** **

L.usitatissimum-Lus10042553
Marijuana-scaffold3694
Textile-hemp-csa_locus_6842_iso_2_len_854_ver_2
H.lupulus-HL.SW.v1.0.G028342.1
-----
CTGTCCATGGCTAATCGGGAAGAAACCAATAGGCTCTCAGTTCTTTATTTGCACAGA
TCTTTCAATGGCTAATCGGGAAGAAACCAATAGGCTCTCAGTTCTTTATATGCACCTGA
TCTTTCAATGGCTAATCGGGAAGAAACCAATAGGCTCTCAGTTCTTTATATGCACCGA
TCTTTCAATGGCTAATCGGGAAGAAACCAATAGGCTCTCAGTTCTTTATTTGCACCGA
**.*.*** **.*.*** **.*.*** **.*.*** **.*.*** **.*.*** **.*.*** **

L.usitatissimum-Lus10042553
Marijuana-scaffold3694
Textile-hemp-csa_locus_6842_iso_2_len_854_ver_2
H.lupulus-HL.SW.v1.0.G028342.1
-----
TAAGACAGCTTGGCTAGATGGGAAGCAGTGTGTGTTTGGGAAAGTTGTTGATGGGTATGG
CAAGACCGACTGGCTTGTATGGGAACATGTTGTTTGGGAAAGTTGTTGATGGATATGG
CAAGACCGACTGGCTTGTATGGGAACATGTTGTTTGGGAAAGTTGTTGATGGATATGG
CAAGACCGACTGGCTTGTATGGGAAGCAGTGTGTGTTTGGGAAAGTTGTTGATGGATATGG
**.*.*** **.*.*** **.*.*** **.*.*** **.*.*** **.*.*** **.*.*** **

L.usitatissimum-Lus10042553
Marijuana-scaffold3694
Textile-hemp-csa_locus_6842_iso_2_len_854_ver_2
H.lupulus-HL.SW.v1.0.G028342.1
-----
ATTTGTGAAGGAGATGGAGAAGTTGGTTTTCAGATAGCGGAATTAATCTCTCAGTCTGTTGT
CATAGTCAAAGAAATGGAGAAGTTGGTTTTCAGTGTGGAATGACTTCTCAACCTGTTAT
CATAGTCAAAGAAATGGAGAAGTTGGTTTTCAGTGTGGAATGACTTCTCAACCTGTTAT
TATAGTCAAAGAAATGGAGAAGTTGGTTTTCAGTGTGGAATGACTTCTCAACCTGTTAT
:* **.*.*** **.*.*** **.*.*** **.*.*** **.*.*** **.*.*** **

L.usitatissimum-Lus10042553
Marijuana-scaffold3694
Textile-hemp-csa_locus_6842_iso_2_len_854_ver_2
H.lupulus-HL.SW.v1.0.G028342.1
-----
TATTGAGGACTGTGGCAGATTGATGATGAGCAACAGTGA-----
CATTGAAGATTGTGGACAGTTGACTGAGAACTAATCTTGTAGAAAATGTTAAATTAAGAT
CATTGAAGATTGTGGACAGTTGACTGAGAACTAATCTTGTAGAAAATGTTAAATTAAGAT
CATTGAAGATTGTGGACAGTTGACTGAGAACTAATGTAGAAAATGTTAAATTAAGAT
**.*.*** **.*.*** **.*.*** **.*.*** **.*.*** **.*.*** **.*.*** **

L.usitatissimum-Lus10042553
Marijuana-scaffold3694
Textile-hemp-csa_locus_6842_iso_2_len_854_ver_2
H.lupulus-HL.SW.v1.0.G028342.1
-----
TCCAAGCAACTTGTATGTTTTTTTGTGCTTTTGTGCTTGGGCTCTCGGGGAAATAATTT
TCCAAGCAACTTGTATGTTTTTTTGTGCTTTTGTGCTTGGGCTCTCGGGGAAATAATTT
TCCAAGCAACTT-----TTTTTGTGCTTTTGTGCTTGGGCTTCAAGGAAATAAGAA
-----

L.usitatissimum-Lus10042553
Marijuana-scaffold3694
Textile-hemp-csa_locus_6842_iso_2_len_854_ver_2
H.lupulus-HL.SW.v1.0.G028342.1
-----
ATGTACTAAATCTTATGCAAGCCCTGAATACAGGCTGGG-----TACTCCAATCT
ATGTACTAAATCTAATGCAAGCCCTGAATACAGGCTGGG-----TACTCCAATCT
ATGTCTA-----AATGCAAGGGTGAATCCCATGCTGATTTAGTTTAACTCAATTTT
-----

L.usitatissimum-Lus10042553
Marijuana-scaffold3694
Textile-hemp-csa_locus_6842_iso_2_len_854_ver_2
H.lupulus-HL.SW.v1.0.G028342.1
-----
CTTAATATTTGACTCTGTATATTTTATGCTTTGATGATACATAAATAAATTTCTTTATTT
CTTAATATTTGACTCTGTATATTTTATGCTTTGATGATACATAAATAAATTTCTTTATTT
CATAATATTTGACTCTGTATATTTTGTGTTTGA-----TACTTTAATAAATTTCT-TATT
-----

L.usitatissimum-Lus10042553
Marijuana-scaffold3694
Textile-hemp-csa_locus_6842_iso_2_len_854_ver_2
H.lupulus-HL.SW.v1.0.G028342.1
-----
CATGAAATGTGGTCTTTTTCTGGAAAAATATAATAACCAATTTATCATCTCGGAAAT
CATGAAAAA-----
CATGAAA-----
-----

```

L.usitatissimum-Lus10042553  
Marijuana-scaffold3694  
Textile-hemp-csa\_locus\_6842\_iso\_2\_len\_854\_ver\_2  
H.lupulus-HL.SW.v1.0.G028342.1

-----  
GACTTTTTTTTAAACATAACAATACTGCGAGCATTGATGATTCAGA  
-----



|                                                                                                                                                                                                           |                                                                                                                                                                                                                                                                   |
|-----------------------------------------------------------------------------------------------------------------------------------------------------------------------------------------------------------|-------------------------------------------------------------------------------------------------------------------------------------------------------------------------------------------------------------------------------------------------------------------|
| <p>L.usitatissimum-Lus10000872<br/>                 Marijuana-scaffold25527<br/>                 Textile-hemp-csa_locus_1460_iso_2_len_1872_ver_2<br/>                 H.lupulus-HL.SW.v1.0.G008610.1</p> | <p>AGATTGGCGTGGTGGTGGAGCTAGTCAGAATATCATTCCAAGTTCTACCGGTGCAGC<br/>                 GGATTGGAGAGGAGGCCCGTGGAGCTGGACAAAATATATTCTAGTTCTACTGGTGCAGC<br/>                 GGATTGGAGAGGAGGCCCGTGGAGCTGGACAAAATATCATTCTAGTTCTACTGGTGCAGC<br/>                 -----</p>    |
| <p>L.usitatissimum-Lus10000872<br/>                 Marijuana-scaffold25527<br/>                 Textile-hemp-csa_locus_1460_iso_2_len_1872_ver_2<br/>                 H.lupulus-HL.SW.v1.0.G008610.1</p> | <p>GAAGGCTGTTGGAAAGTACTTCCAGAGCTGAACGGAAACTTACTGGCATGGCTTTCCG<br/>                 AAAGGCTGTTGGTAAAGTTCTCCAGAACTGAATGGAAAGCTTACTGGAATGGCTTTCCG<br/>                 AAAGGCTGTTGGTAAAGTTCTCCAGAACTGAATGGAAAGCTTACTGGAATGGCTTTCCG<br/>                 -----</p>    |
| <p>L.usitatissimum-Lus10000872<br/>                 Marijuana-scaffold25527<br/>                 Textile-hemp-csa_locus_1460_iso_2_len_1872_ver_2<br/>                 H.lupulus-HL.SW.v1.0.G008610.1</p> | <p>TGTCCCAACGCCTAATGTTTCTGTTGTGGACTTAACTTGTGCACTTGAGAAGAGTGCATC<br/>                 TGTTCaACTCCTAATGTCTCAGTGGTgGACTTAACTTGTGCACTTGAGAAGAGTGCCTC<br/>                 TGTTCCTACTCCTAATGTCTCAGTGGTAGACTTAACTTGTGCACTTGAGAAGAGTGCCTC<br/>                 -----</p> |
| <p>L.usitatissimum-Lus10000872<br/>                 Marijuana-scaffold25527<br/>                 Textile-hemp-csa_locus_1460_iso_2_len_1872_ver_2<br/>                 H.lupulus-HL.SW.v1.0.G008610.1</p> | <p>ATACGATGATGTTAAAGCTGCTATTAAAGTATGCATCTGAGGGACCATTGAAGGGCATTCT<br/>                 TTATGAA-----<br/>                 TTATGAAGATGTCAAGGCAGCCATTAAAGTATGCGTCAGAGGGACCATTAAAGGGCATTCT<br/>                 -----</p>                                              |
| <p>L.usitatissimum-Lus10000872<br/>                 Marijuana-scaffold25527<br/>                 Textile-hemp-csa_locus_1460_iso_2_len_1872_ver_2<br/>                 H.lupulus-HL.SW.v1.0.G008610.1</p> | <p>TGGATACACTGATGAGGATGTCGTTTCTAATGATTTTCATCGGCACTCAAGGTCAAGCAT<br/>                 TGGGTACACAGATGAAGATGTTGTCTCCAATGATTT-GTTGGTGACACAAGGTCAAGTAT<br/>                 -----</p>                                                                                  |
| <p>L.usitatissimum-Lus10000872<br/>                 Marijuana-scaffold25527<br/>                 Textile-hemp-csa_locus_1460_iso_2_len_1872_ver_2<br/>                 H.lupulus-HL.SW.v1.0.G008610.1</p> | <p>ATTGATGCAAGGCCGGGATAGGGTTGAGCAGTTCCCTTCATGAAGCTCGTGTCTGGTA<br/>                 TTTGATGCCAAGGCTGGAATAGGGCTTAGCACATCCTTCATGAAGCTTGTGTCTATGGTA<br/>                 -----</p>                                                                                    |
| <p>L.usitatissimum-Lus10000872<br/>                 Marijuana-scaffold25527<br/>                 Textile-hemp-csa_locus_1460_iso_2_len_1872_ver_2<br/>                 H.lupulus-HL.SW.v1.0.G008610.1</p> | <p>CGACAATGAGTGGGGTTACAGCAACCGAGTTCTGGACCTCATCGAGCACATGGCCTTGGT<br/>                 CGATAAGCAATGGGGATACAGCAACCGTGTCTTGGACCTTATTGAGCACATGGCCTTGGT<br/>                 -----</p>                                                                                  |
| <p>L.usitatissimum-Lus10000872<br/>                 Marijuana-scaffold25527<br/>                 Textile-hemp-csa_locus_1460_iso_2_len_1872_ver_2<br/>                 H.lupulus-HL.SW.v1.0.G008610.1</p> | <p>AGCTTCCCT--GAAGTGA-----<br/>                 AGCGGCTACCTACTAAGTATTGTTGCTGCTGCAACAACAATTTTTTTAGAGCTCTTGCT<br/>                 -----</p>                                                                                                                        |
| <p>L.usitatissimum-Lus10000872<br/>                 Marijuana-scaffold25527<br/>                 Textile-hemp-csa_locus_1460_iso_2_len_1872_ver_2<br/>                 H.lupulus-HL.SW.v1.0.G008610.1</p> | <p>-----<br/>                 ATGAGTTTGGTTGGAGAGTAGTTAATACATTTTGATAGGGTTTCGGGTTTTTCTCATCT<br/>                 -----</p>                                                                                                                                          |
| <p>L.usitatissimum-Lus10000872<br/>                 Marijuana-scaffold25527<br/>                 Textile-hemp-csa_locus_1460_iso_2_len_1872_ver_2<br/>                 H.lupulus-HL.SW.v1.0.G008610.1</p> | <p>-----<br/>                 CATTGGTCCGATTTAAAGATTTTCGCATGGTTGAGTTTGAATAATGAAAATCTGAGA<br/>                 -----</p>                                                                                                                                            |
| <p>L.usitatissimum-Lus10000872<br/>                 Marijuana-scaffold25527<br/>                 Textile-hemp-csa_locus_1460_iso_2_len_1872_ver_2<br/>                 H.lupulus-HL.SW.v1.0.G008610.1</p> | <p>-----<br/>                 TGTATGGGCTTTGATAATCATTGTCTCATGGAGTTGATGCCATTAATATACATATTGAG<br/>                 -----</p>                                                                                                                                          |
| <p>L.usitatissimum-Lus10000872<br/>                 Marijuana-scaffold25527<br/>                 Textile-hemp-csa_locus_1460_iso_2_len_1872_ver_2<br/>                 H.lupulus-HL.SW.v1.0.G008610.1</p> | <p>-----<br/>                 AAGGGTTTCTTCTGCTCTCTGTATGGCTTTTCTTTCTAGTAACTTTGACATGAATCT<br/>                 -----</p>                                                                                                                                            |
| <p>L.usitatissimum-Lus10000872<br/>                 Marijuana-scaffold25527<br/>                 Textile-hemp-csa_locus_1460_iso_2_len_1872_ver_2<br/>                 H.lupulus-HL.SW.v1.0.G008610.1</p> | <p>-----<br/>                 TTCATCTCTGATAAAAAATGGTTTCATTTCCTATGTTGATCAATGCTAGTATCAACTACC<br/>                 -----</p>                                                                                                                                         |
| <p>L.usitatissimum-Lus10000872<br/>                 Marijuana-scaffold25527<br/>                 Textile-hemp-csa_locus_1460_iso_2_len_1872_ver_2<br/>                 H.lupulus-HL.SW.v1.0.G008610.1</p> | <p>-----<br/>                 AAATACATCTGAATATGGGTACAGCTCAAGTTATAGGCATAATAAATAATTTTTAAACCAC<br/>                 -----</p>                                                                                                                                        |
| <p>L.usitatissimum-Lus10000872<br/>                 Marijuana-scaffold25527<br/>                 Textile-hemp-csa_locus_1460_iso_2_len_1872_ver_2<br/>                 H.lupulus-HL.SW.v1.0.G008610.1</p> | <p>-----<br/>                 ATTATAAATGCAAAATGGCATCAAATTAATTGCT<br/>                 -----</p>                                                                                                                                                                   |

eTIF4E

L.usitatissimum-Lus10023733
Marijuana-scaffold35425
Textile-hemp-csa\_locus\_9035\_iso\_2\_len\_909\_ver\_2
H.lupulus-HL.SW.v1.0.G000377.1

-----A
-----GAGAGATACACTTTTCATTCAAAG--CTCCAACGAATCCTAACCA
CGGCTCTCCGATCTGAGAGATACACTTTTCATTCAAAG--CTCCAACGAATCCTAACCA
-----GATTCACATTCATCTCACTTCCATACATCGAATCGGAACCA
\*

L.usitatissimum-Lus10023733
Marijuana-scaffold35425
Textile-hemp-csa\_locus\_9035\_iso\_2\_len\_909\_ver\_2
H.lupulus-HL.SW.v1.0.G000377.1

TGGCGCAACACGACTGCGGCGACCGAAGTAAGCGACGCATCGGTGGTTACGTCGCGCG
TGGCGACTGAGATGGCAGCGGCCACCGAGGCCAACATTTAGCAGAGCCCGAGGCTGCGAG
TGGCGACTGAGATGACGCGGCCACCGAGGCCAACATTTAGCAGAGCCCGAGGCTGCGAG
TGGCGACTGAGATGACGCGGCCACCGAGGCCAACAGTGTAGCAGAGCCCGAGATTGCGAG
\*\*\*\*\*.\*.:.\*:\*\*.\* \*\* \*\*.\* \*.\* . \*.\*:\* .\*.\*\*\*

L.usitatissimum-Lus10023733
Marijuana-scaffold35425
Textile-hemp-csa\_locus\_9035\_iso\_2\_len\_909\_ver\_2
H.lupulus-HL.SW.v1.0.G000377.1

ACGCAATGGCG--GA-----GACGTCCCCTCAGTCTCAAGCTCCACAGAAAGTGGGA
CGGCTATTGTGGCCGAGAACAAAGCGCAAGGCGAGCCACACAAGTTGGATAAGAAATGGGA
CGGCTATTGTGGCCGAGAACAAAGCGCAAGGCGAGCCACACAAGTTGGATAAGAAATGGGA
CGGCAATGGTGGCCGAAAGCAAGACACAGCCGAGCCGCAAGTTGGATAAGAAATGGGA
.\*.\*\*.\* \* \*\* \*\*.\* . \*\* \* \*\*.\* \*\* \* \*\*.\* \*\* \* \*\*.\* \*\* \* \*\*.\* \*\* \* \*\*.\*

L.usitatissimum-Lus10023733
Marijuana-scaffold35425
Textile-hemp-csa\_locus\_9035\_iso\_2\_len\_909\_ver\_2
H.lupulus-HL.SW.v1.0.G000377.1

CCTTCTGGTTCGACAACCAATCCAAACCCAAAGCAGGCGCGCTGGGGCACTCTCTTC
CCTTTTGGTTCGATAAACCAATCTAAGCCTAAGCAAGGCGCGCTGGGGCACTCTCTTC
CCTTTTGGTTCGATAAACCAATCTAAGCCTAAGCAAGGCGCGCTGGGGCACTCTCTTC
CCTTTTGGTTCGATAAACCAATCCAAAGCCAAAGCAAGGCGCTGGGGCACTCTCTTC
\*\*\*\* \*\*\*\*\* \*\* \*\*.\* \*\* \*\*.\* \*\* \*\*.\* \*\* \*\*.\* \*\* \*\*.\* \*\* \*\*.\* \*\* \*\*.\*

L.usitatissimum-Lus10023733
Marijuana-scaffold35425
Textile-hemp-csa\_locus\_9035\_iso\_2\_len\_909\_ver\_2
H.lupulus-HL.SW.v1.0.G000377.1

GTAGTGTCTACACTTTCGACACCGTCGAGGAATTTGTGTGTTGTATGAACAGGTATTTA
GCTCTGTCTACACTTTTGACACCGTCGAGGAATTTGTGTGTTGTATGACAGGTATTTCA
GCTCTGTCTACACTTTTGACACCGTCGAGGAATTTGTGTGTTGTATGACAGGTATTTCA
GCTCTGTCTACACTTTTGACACCGTCGAGGAATTTGTGTGTTGTATGACAGGTATTTCA
\* : \*\*\*\*\* \*\* \*\*\*\*\* \*\* \*\*\*\*\* \*\* \*\*\*\*\* \*\* \*\*\*\*\*

L.usitatissimum-Lus10023733
Marijuana-scaffold35425
Textile-hemp-csa\_locus\_9035\_iso\_2\_len\_909\_ver\_2
H.lupulus-HL.SW.v1.0.G000377.1

AGCCTAGCAAGCTACCTGGACAAGCTGAATCCACTGTTTAGGGATGGGTTGAACCCA
AGCCTAGCAAGTTGACATCAGATTCAGATTTATAATTAATCTA-----
AGCCTAGCAAGTTGACATCAGATTCAGATTTCCATTTGTTCAAAGCTGGGTTGAACCCA

L.usitatissimum-Lus10023733
Marijuana-scaffold35425
Textile-hemp-csa\_locus\_9035\_iso\_2\_len\_909\_ver\_2
H.lupulus-HL.SW.v1.0.G000377.1

AGTGGGAAGATCCAGAGTGTGCTAATGGGGAAAGTGGAGTGTACCTGTAGTAAAAACA
-----CAGGTTTACTGTTATCAGCAGTAGAAAAAT
AGTGGGAAGATCCAGAGTGTGCTAATGGGGAAAGTGGAGTGTATCAGCAGTAGAAAAAT
-----

L.usitatissimum-Lus10023733
Marijuana-scaffold35425
Textile-hemp-csa\_locus\_9035\_iso\_2\_len\_909\_ver\_2
H.lupulus-HL.SW.v1.0.G000377.1

CCACCTTGGATAAGATGTGGCTCGAACTCTGATGGCTTTGATGGAGAGCAATTTGATG
CTACCCCTTGACACTATGTGGTTAGAACTTTGATGGCTTTGATGGAGAGCAATTTGATG
CTACCCCTTGACACTATGTGGTTAGAACTTTGATGGCTTTGATGGAGAGCAATTTGATG
-----

L.usitatissimum-Lus10023733
Marijuana-scaffold35425
Textile-hemp-csa\_locus\_9035\_iso\_2\_len\_909\_ver\_2
H.lupulus-HL.SW.v1.0.G000377.1

AATCCGAGGAGATATGTGGCGTGGTTGCCAAGTGTGCGTACAAGGCAAGATAAACTTGCTC
AGGCTGATGAGATTTGTGGTGTGGTTCGCAAGCGGTGCGCCAGAGGCAAGGCAAACTTGCGC
AGGCTGATGAGATTTGTGGTGTGGTTCGCAAGCGGTGCGCCAGAGGCAAGGCAAACTTGCGC
-----

L.usitatissimum-Lus10023733
Marijuana-scaffold35425
Textile-hemp-csa\_locus\_9035\_iso\_2\_len\_909\_ver\_2
H.lupulus-HL.SW.v1.0.G000377.1

TCTGGACTAAGACGGCTGCTAATGAAGCTGTCCAGATGGGCATCGGAAGAAAGTGGAAAG
TCTGGACCAAGACAGCTGCCAATGAGGCTGTTCCAGATGAGCATTGGAAGAAAGTGGAAAG
TCTGGACCAAGACAGCTGCCAATGAGGCTGTTCCAGATGAGCATTGGAAGAAAGTGGAAAG
-----

L.usitatissimum-Lus10023733
Marijuana-scaffold35425
Textile-hemp-csa\_locus\_9035\_iso\_2\_len\_909\_ver\_2
H.lupulus-HL.SW.v1.0.G000377.1

ATATCATCGATGTCAGTACGAACTCACCTACAATTTCCATGATGATCTCGCAGGAAAG
AGATACTAGACACAACCTGACAAAATCACTTACAGCTTCCATGATGATTCGAAAAGAGAGA
AGATACTAGACACAACCTGACAAAATCACTTACAGCTTCCATGATGATTCGAAAAGAGAGA
-----

L.usitatissimum-Lus10023733
Marijuana-scaffold35425
Textile-hemp-csa\_locus\_9035\_iso\_2\_len\_909\_ver\_2
H.lupulus-HL.SW.v1.0.G000377.1

GATCTGTGAAGAGCCGATACAGCGTATGA-----
GATCTGCAAGGGTGTGTTACACTATACCATGAACATTTACGACAAATTTGAGGCTTGATC
GATCTGCAAGGGTGTGTTACACTATACCATGAACATTTACGACAAATTTGAGGCTTGATC
-----

L.usitatissimum-Lus10023733
Marijuana-scaffold35425
Textile-hemp-csa\_locus\_9035\_iso\_2\_len\_909\_ver\_2
H.lupulus-HL.SW.v1.0.G000377.1

-----
CCTTACTTACTTACTTTCGAAATTTTACAAAATACTAGCAGCGGCAACTCATTGAGATTTT
CCTTACTTACTTACTTTCGAAATTTTACAAAATACTAGCAGCGGCAACTCATTGAGATTTT
-----

L.usitatissimum-Lus10023733
Marijuana-scaffold35425
Textile-hemp-csa\_locus\_9035\_iso\_2\_len\_909\_ver\_2
H.lupulus-HL.SW.v1.0.G000377.1

-----
GATGTTTTCTGTCTATTGAGGAAAACCAATTAGATTAATATTTTTTTGTGGTGTTTTTT
GATGT-TTCTGTCTATTGAGGAAAACCAATTAGATTAATATTTTTTTGTGGTGTTTTTT
-----

L.usitatissimum-Lus10023733
Marijuana-scaffold35425
Textile-hemp-csa\_locus\_9035\_iso\_2\_len\_909\_ver\_2
H.lupulus-HL.SW.v1.0.G000377.1

-----
GATTGTAACATGACAACCGCTCTTTATTTTTTTTATTGATGCAAAATTTTTCATCAAAA--
GATTGTAACATGACAACCGCTCTTTATTTTTTTTATTGATGCAAAATTTTTCATCAAAA--
-----

L.usitatissimum-Lus10023733
Marijuana-scaffold35425
Textile-hemp-csa\_locus\_9035\_iso\_2\_len\_909\_ver\_2
H.lupulus-HL.SW.v1.0.G000377.1

-----
AATGATTACTTAAA
AATGATTACTTAAA
-----

TIP41

```

L.usitatissimum-Lus10026859
Textile-hemp-csa_locus_3380_iso_1_len_1164_ver_2
H.lupulus-HL.Tea.v1.0.G021288.1
Marijuana-scaffold76878
-----
ATTATTTTGATTGCCCATTTATAATGAAGTTGATCAAATTCAAAACTCAAAAGTTGGCC
ATTATTTTGATTGCCCATTTATAATGAAGTTGATCAAATTCAAAACTCAAAAGTTGGCC
-----

L.usitatissimum-Lus10026859
Textile-hemp-csa_locus_3380_iso_1_len_1164_ver_2
H.lupulus-HL.Tea.v1.0.G021288.1
Marijuana-scaffold76878
-----
TTGGGCCCAAATTCACAGTGAATAATAAGGCAAGGCAAGGCAA--AGGGACTCAAAC
TTGGGCCCAAATTCACAGTGAATAATAAGGCAAGGCAAGGCAaggtacctttgagggcgagC
-----

L.usitatissimum-Lus10026859
Textile-hemp-csa_locus_3380_iso_1_len_1164_ver_2
H.lupulus-HL.Tea.v1.0.G021288.1
Marijuana-scaffold76878
-----
-----ATGGCCGAGGAGGTAGACGACAAGGACCTGA
CGAAGATCGATCGAACCGGACTGTGGAAATGGAAGTGGAGTTGACCATAACGAGCTCA
CGAAGATCGATCGAACCGGACTGTGGAAATGGAAGTGGAGTTGACCATAACGAGCTCA
-----

L.usitatissimum-Lus10026859
Textile-hemp-csa locus 3380 iso 1 len 1164 ver 2
H.lupulus-HL.Tea.v1.0.G021288.1
Marijuana-scaffold76878
-----
AAGCCGCGGAGCTGAGCTTTTGACCGAGCGCCTCCGCGGACTCCGTATTCATGGCTGGG
AGGCGGCTGGAGCCGAGCTTCTAACTGAAGGACGTCATGGCATCCGTATCCATGGTTGGG
-----
AGGCGGCTGGAGCCGAGCTTCTAACTGAAGGACGTCATGGCATCCGTATCCATGGTTGGG
-----

L.usitatissimum-Lus10026859
Textile-hemp-csa_locus_3380_iso_1_len_1164_ver_2
H.lupulus-HL.Tea.v1.0.G021288.1
Marijuana-scaffold76878
-----
AGATCGTCTCAAAGCTGGCTCTATTCTCACTCTCCGCTGTGAACATGGACGTTTGC
AGGTCGAGTCTCGCAATTGCTCCATTCTCACCTCTTCCATCTTTGAAC-----
AGGTCGAGTCTCGCAATTGCTCCATTCTCACCTCTTCCACTTTGAAC-----

L.usitatissimum-Lus10026859
Textile-hemp-csa_locus_3380_iso_1_len_1164_ver_2
H.lupulus-HL.Tea.v1.0.G021288.1
Marijuana-scaffold76878
-----
TGCACGTACACCTCGAACTCTTTGTTGTACAAAAGTGGTGGTGTGGCCAAAAGTTTGTG
-----

L.usitatissimum-Lus10026859
Textile-hemp-csa_locus_3380_iso_1_len_1164_ver_2
H.lupulus-HL.Tea.v1.0.G021288.1
Marijuana-scaffold76878
-----
CCGGTTGCTCTGTCCGCTACTGGTAAATATACATGCTCAACTACTTGCAGGTGGGAGG
AGTGGGGAG
-----
AGTGGGGAG
-----

L.usitatissimum-Lus10026859
Textile-hemp-csa_locus_3380_iso_1_len_1164_ver_2
H.lupulus-HL.Tea.v1.0.G021288.1
Marijuana-scaffold76878
-----
AGAAACTGCAGACCTCTCACCTACCAGATGGTGTGGCGCAGCTGTCTGGTTCTCA
AAAAGCTTCAGACATCCCATTGCGCAGAAATGATATTGGGGCAGTTGTTGGTCTCTA
AAAAGCTTCAGACATCCCATTGCGCAGAAATGATATTGGGGCAGTTGTTGGTCTCTA
-----

L.usitatissimum-Lus10026859
Textile-hemp-csa locus 3380 iso 1 len 1164 ver 2
H.lupulus-HL.Tea.v1.0.G021288.1
Marijuana-scaffold76878
-----
AACATATCAAGAGTGGCACCAAAATCCATTTTAATGCATTGTATGCGCTAACCGGTTGGG
AGCACATTCCTAGTGGCACTAAAATTCATTTTAATGCGTTGTATGCTCTACTTGGATGGA
AGCACAACTCCTAGTGGCACTAAAATTCATTTTAATGCGTTGTATGCTCTACTTGGATGGA
-----

L.usitatissimum-Lus10026859
Textile-hemp-csa_locus_3380_iso_1_len_1164_ver_2
H.lupulus-HL.Tea.v1.0.G021288.1
Marijuana-scaffold76878
-----
AGCAGGAAGCTTTACCCCGAGTTGAAGTTCCCTGCTGTCACAATGGAAATTCAGAAGCA
AACAGGAAGCTCTGCCGCTGTGGAAAGTTCCGGCCGCTGAAAATGGAAATTCGCAGCA
AACAGGAAGCTCTGCCGCTGTGGAAAGTTCCGGCCGCTGAAAATGGAAATTCGCAGCA
-----

L.usitatissimum-Lus10026859
Textile-hemp-csa_locus_3380_iso_1_len_1164_ver_2
H.lupulus-HL.Tea.v1.0.G021288.1
Marijuana-scaffold76878
-----
AGCCGTTCCACAGGTGATACTAGATTATGATTATACACTTACACACCATACATTGGAA
AACCATCCCAACAGGTCATTTGGATTATGATTACACTTTTACACACCTTATCGTGGAA
AACCATCCCAACAGGTCATTTGGATTATGATTACACTTTTACACACCTTATCGTGGAA
-----

L.usitatissimum-Lus10026859
Textile-hemp-csa locus 3380 iso 1 len 1164 ver 2
H.lupulus-HL.Tea.v1.0.G021288.1
Marijuana-scaffold76878
-----
GTGAAACTATTGAGA-----CCAGTGTGAAAGTGGAGAACCATTCTGCAAGTG
GTGAAATGATTGAGATGGATGCAACCCGAGCAAGAAAGAGAGGATTCCTCTGAGGGAACCT
GTGAAACaATTGAGATGATGCAACCCGAGCAAGAAAGAGAGGATTCCTCTGAGGGAACCT
-----

L.usitatissimum-Lus10026859
Textile-hemp-csa_locus_3380_iso_1_len_1164_ver_2
H.lupulus-HL.Tea.v1.0.G021288.1
Marijuana-scaffold76878
-----
GCAGGCTTCAATGGGAGGATTGCAAGGAACGAATTGATGTTGCTTCCTAGCTCAAAG
ACAATGTCAGTGGGAGGAGAGCAAGGAGAAAATGATATGGCTGCACTGGCACCCAAAG
-----
ACAATCTCCAGTGGGAGGAGAGCAAGGAGAAAATGATATGGCTGCACTGGCACCCAAAG
-----

L.usitatissimum-Lus10026859
Textile-hemp-csa_locus_3380_iso_1_len_1164_ver_2
H.lupulus-HL.Tea.v1.0.G021288.1
Marijuana-scaffold76878
-----
AGCCTATTCTTTCTATGACGAGTGTCTTTATGAGATGAAGTGGCTGATAATGGAG
AGCCTATTCTTTCTATGATGAGGTAATATTATATGAGATGAAGTGGCAGATAATGGGG
AGCCTATTCTTTCTATGATGAGGTAATATTATGAGATGAAGTGGCAGATAATGGGG
-----

L.usitatissimum-Lus10026859
Textile-hemp-csa_locus_3380_iso_1_len_1164_ver_2
H.lupulus-HL.Tea.v1.0.G021288.1
Marijuana-scaffold76878
-----
TGTCACTTTAACAGTAAAAGTGAGAGTATGCAAGTTATTGGTTCTTCTTTGCGAT
TGTGCGCTTCAACTGTTAAAGTGAGAGTATGCCAAGTCTTGGTTCTTCTATTGCGCT
-----
TGTGCGCTTCAACTGTTAAAGTGAGAGTATGCCAAGTCTTGGTTCTTCTATTGCGCT
-----

L.usitatissimum-Lus10026859
Textile-hemp-csa_locus_3380_iso_1_len_1164_ver_2
H.lupulus-HL.Tea.v1.0.G021288.1
Marijuana-scaffold76878
-----
TTTGGCTTAGAGTTGATGGAGTCTGATGAGATTACGGGACACTCGCATCCATTGTGCTT
ATTGGCTCAGAGTTGATGGAGTCTTATGAGACTAAGAGACACTCGAATGCATTGTGTAT
---GTCAGAGTTGATGGAGTCTTATGAGATAAGAGACACTCGTATGCATTGTGTAT
ATTGGCTCAGAGTTGATGGAGTCTTATGAGACTAAGAGACACTCGAATGCATTGTGTAT
*** ***** ** ***** **.****** ** ***** :*
-----

L.usitatissimum-Lus10026859
Textile-hemp-csa locus 3380 iso 1 len 1164 ver 2
H.lupulus-HL.Tea.v1.0.G021288.1
Marijuana-scaffold76878
-----
TTAGTGACAGTCCCAAGCCTGTCATCTTCGCGAAAGTTGCTGGAGACAAGCAACCTTCG
TTGGTGACAAGTCAAATCCAATCTTCTCGAGAAAGCTGTTGGAGAGAAGCTACATTTTC
TTGGTGACAATCAAATCCAATCTTCTCGAGAAAGCTGCTGGAGAGAGGCTACATTTTC
TTGGTGACAATCAAATCCAATCTTCTCGAGAAAGCTGCTGGAGAGAAGCTACATTTTC
TTGGTGACAATCAAATCCAATCTTCTCGAGAAAGCTGCTGGAGAGAAGCTACATTTTC
**.****** ** ***** ** ***** **.****** **.****** :*
-----

```



L.usitatissimum-Lus10026859  
 Textile-hemp-csa\_locus\_3380\_iso\_1\_len\_1164\_ver\_2  
 H.lupulus-HL.Tea.v1.0.G021288.1  
 Marijuana-scaffold76878

AGGCTCTGTCTGCTAAAGGG-TACCCCATGTGACTCTGCTTACAGTGATCCTAACAAAC  
 AATCTTTATCTGCAA-AAGGATACCCCTTCTGATCTGCTGCTTACAGTGACCCAGCTCC  
 AATATTTATCTGCAAAGGATAACCCCTTCTGATCTGCTGCTTACAGTGACCCAGCTCC  
 AATCTTTATCTGCAA-AAGGATACCCCTTCTGATCTGCTGCTTACAGTGACCCAGTgCC  
 \* . . \* .\*\*\*\*\*. . \* . \* \* \* \* \* \* : \* \* \* \* . \* \* \* \* \* \* \* \* \* \* \* \* . \* \*

L.usitatissimum-Lus10026859  
 Textile-hemp-csa\_locus\_3380\_iso\_1\_len\_1164\_ver\_2  
 H.lupulus-HL.Tea.v1.0.G021288.1  
 Marijuana-scaffold76878

ATCAGCCACAGGCTTCCAGTCGTTATGCATAGGACTCAAAGCTTATAGTCCCTGTAA  
 ATCAGCCAGAGACTACCCATAGTCATGCACAAGTCTGAAGTGTAAAGT-CCCTGGTAA  
 ATCAGCCAGAGACTTCCCATTTGTCATGCACAAGTCTGAAGTGTAAAGT-CCCTGGTAA  
 ATCAGCCAGAGACTACCCATtGTCATGCACAAGTCTGAAGTGTAAAGT-CCCcGGTAA  
 \*\*\*\*\* \*\*.\*.\*.\*.\* \*\* \* \* \* \* \* \* .\*:\*\* \*\*.\*:\*\*\*\*\*;\*\* \*\* \* \*\* \*

L.usitatissimum-Lus10026859  
 Textile-hemp-csa\_locus\_3380\_iso\_1\_len\_1164\_ver\_2  
 H.lupulus-HL.Tea.v1.0.G021288.1  
 Marijuana-scaffold76878

-----  
 CCTCTAGAGCTGTAATAATATATGCACGGATGATTGTTGAATTTAGCTTTTCATTGTG  
 CCTCTAGAGCTGTAATA-ATTATATGCACGGAAAGATTGTTGAATTTAGCTTTTCATTGTG  
 CCTCTAGAGCTGTAATA-ATTATATGCACGGAAaGATTGTTGAATTTAGCTTTTCATTGTG

L.usitatissimum-Lus10026859  
 Textile-hemp-csa\_locus\_3380\_iso\_1\_len\_1164\_ver\_2  
 H.lupulus-HL.Tea.v1.0.G021288.1  
 Marijuana-scaffold76878

-----  
 GTTCTGGTTGATGTTAACTTATTTATTTACGAAAAGAAAA-----TCGACAT  
 GTTCTGGTTGATGTTAACTTATTTATTTACAAAAAGGAAAAAATGGAATAAACGACT  
 GTTCTGGTTGATGTTAACTTATTTATTTACGAAAAGAAAA---A-----TtGcCAT

L.usitatissimum-Lus10026859  
 Textile-hemp-csa\_locus\_3380\_iso\_1\_len\_1164\_ver\_2  
 H.lupulus-HL.Tea.v1.0.G021288.1  
 Marijuana-scaffold76878

-----  
 ACATTTTCTTGTAATAAATAAGTTTAACATCAACCAGAACC  
 ACATTTTCTTGTA-----  
 ACATTTTCTTGTA-----



L.usitatissimum-Lus10031032  
H.lupulus-HL.SW.v1.0.G004672.1  
Textile-hemp-csa\_locus\_11261\_iso\_1\_len\_1086\_ver\_2  
Marijuana-scaffold23181

ACATGGCTTGTGTCTGATGTACCGTGGTGACGTGGTTCCCAAAGATGTCAACGCAGCTG  
ACATGGCCTGCTGTTTGATGTACCGGGTGACGTGCTTCCCAAAGATGTAAACGCCGCCG  
ACATGGCTTGTGTGTGATGTACAGGGGAGATGTTGTACCAAAGGATGTGAACGCAGCAG  
-----

L.usitatissimum-Lus10031032  
H.lupulus-HL.SW.v1.0.G004672.1  
Textile-hemp-csa\_locus\_11261\_iso\_1\_len\_1086\_ver\_2  
Marijuana-scaffold23181

TGGCGACCATCAAGACAAAGAGGACCATCCAGTTCGTGGACTGGTGCCTCACTGGATTCA  
TGGCCA-----  
TCGCCA-----  
-----

L.usitatissimum-Lus10031032  
H.lupulus-HL.SW.v1.0.G004672.1  
Textile-hemp-csa\_locus\_11261\_iso\_1\_len\_1086\_ver\_2  
Marijuana-scaffold23181

AGTGTGGTATCAACTACCAGCCCAACTGTTGTCCCGAGGCGACCTTGCCAAGGTC  
-----  
-----

L.usitatissimum-Lus10031032  
H.lupulus-HL.SW.v1.0.G004672.1  
Textile-hemp-csa\_locus\_11261\_iso\_1\_len\_1086\_ver\_2  
Marijuana-scaffold23181

AGAGGGCTGTGTGCATGATCTCCAACCTCCACCAGTGTGGCAGAGGTTTGGGCGAATTG  
-----  
-----

L.usitatissimum-Lus10031032  
H.lupulus-HL.SW.v1.0.G004672.1  
Textile-hemp-csa\_locus\_11261\_iso\_1\_len\_1086\_ver\_2  
Marijuana-scaffold23181

ACCACAAGTTTGTATCTCATGTACGCCAAGCGTGCATTGCTCCACTGGTATGTGGGTGAGG  
-----  
-----

L.usitatissimum-Lus10031032  
H.lupulus-HL.SW.v1.0.G004672.1  
Textile-hemp-csa\_locus\_11261\_iso\_1\_len\_1086\_ver\_2  
Marijuana-scaffold23181

GTATGGAGGAAGGAGTCTCTGAGGCACGTGAGGATCTGGCTGCTCTTGAGAAGGACT  
-----  
-----

L.usitatissimum-Lus10031032  
H.lupulus-HL.SW.v1.0.G004672.1  
Textile-hemp-csa\_locus\_11261\_iso\_1\_len\_1086\_ver\_2  
Marijuana-scaffold23181

ACGAGGAGGTTGGCGCTGAGGCTCCTGAGGATGGAGAAGATGAAGGTGATGAGTACTGA  
-----  
-----



L.usitatissimum-Lus10028862  
Textile-hemp-csa\_locus\_8286\_iso\_2\_len\_2019\_ver\_2  
H.lupulus-HL.SW.v1.0.G043506.1  
Marijuana-scaffold109107

GGAGAGAAAAGCTGCACAGCTTACCAGGACGATAGTTGGAGTGTGGAAGCTTGTCACTC  
AGAGAGAAAAGCTGCTGACCTTACTAGGACTATTTGGAGTCTGGAAGCTGCCATTC  
AGAGAGAAAAGCTGCTGACCTTACTAGGACTATTTGGAGTCTGGAAGCTGCCATTC  
\*\*\*\*\* \*\* \* \*\*\*\*\* \*\* \* \*\*\*\*\* \*\* \* \*\*\*\*\* \*\* \* \*\*\*\*\* \*\* \* \*\*\*\*\*

L.usitatissimum-Lus10028862  
Textile-hemp-csa\_locus\_8286\_iso\_2\_len\_2019\_ver\_2  
H.lupulus-HL.SW.v1.0.G043506.1  
Marijuana-scaffold109107

GCTTGGTGTGATGCATCGGACCTTAAGCCGGAGAATTTCTGTTTGTGAGTCAACAAGA  
ATTGGGGTTATGCATCGGACCTTAAGCCCTGAGAATTTCTTTTGTCAACAGCAGGGA  
ATTGGGGTTATGCATCGGACCTTAAGCCCTGAGAATTTCTTTTGTCAACAGCAGGGA  
ATTGGGGTTATGCATCGGACCTTAAGCCCTGAGAATTTCTTTTGTCAACAGCAGGGA  
. \* \* \* \* \* \*\*\*\*\* \* \* \* \* \* \*\*\*\*\* \* \* \* \* \* \*\*\*\*\* \* \* \* \* \* \*\*\*\*\*

L.usitatissimum-Lus10028862  
Textile-hemp-csa\_locus\_8286\_iso\_2\_len\_2019\_ver\_2  
H.lupulus-HL.SW.v1.0.G043506.1  
Marijuana-scaffold109107

GGATTGCTGCTCAAACTATTGATTTGGACTATCAATCTTCTTCAAGCCAGGAGAAAG  
GGATGCACTTCTCAAACTATTGACTTTGGTTTATCTGTTTTCTTCAAGCCAGGAGAG  
GGATGCACTTCTCAAACTATTGACTTTGGTTTATCTGTTTTCTTCAAGCCAGG-----  
GGATGCACTTCTCAAACTATTGACTTTGGTTTATCTGTTTTCTTCAAGCCAGGAGAG  
\*\*\*\* \* . \* \*\*\*\*\* \* \* \* \* \* \*\*\*\*\* \* \* \* \* \* \*\*\*\*\*

L.usitatissimum-Lus10028862  
Textile-hemp-csa\_locus\_8286\_iso\_2\_len\_2019\_ver\_2  
H.lupulus-HL.SW.v1.0.G043506.1  
Marijuana-scaffold109107

GTATAGTGTAGTGTGGCAGTCCATACTATGTGGCTCTGAGGTTTTAAAGAACGTTA  
GTTTATGTAGTGTGGTGGCAGCCATATTACGTTGCACCAAGTCTTGGCAGCAGCGTA  
-----  
aTTTATGTAGTGTGGTGGCAGCCATATTACGTTGCACCAAGTCTTGGCAGCAGCGTA

L.usitatissimum-Lus10028862  
Textile-hemp-csa\_locus\_8286\_iso\_2\_len\_2019\_ver\_2  
H.lupulus-HL.SW.v1.0.G043506.1  
Marijuana-scaffold109107

TGGTCCGAGAGCTGATGTATGAGTGTGGTGTATTCTCTACATTCTGTTAAGTGGAGT  
TGGTCCGAGAGCAGATGTTGGAGTGTGGAGTATTCTTTACATTCTGTTAAGTGGAGT  
-----  
TGGTCCGAGAGCAGATGTTGGAGTGTGGAGTATTCTTTACATTCTGTTAAGTGGAGT

L.usitatissimum-Lus10028862  
Textile-hemp-csa\_locus\_8286\_iso\_2\_len\_2019\_ver\_2  
H.lupulus-HL.SW.v1.0.G043506.1  
Marijuana-scaffold109107

GCCACCCTTCTGGGAGAGACCGAGCAGGGAATTTGAGCAGGTTCTCCAGGGTGTACT  
GCCTCCATTTGGGCTGAAAGTGAGCAAGGATATTTGAAGAAGTGTTCATGTGCACCT  
-----  
GCCTCCATTTGGGCTGAAAGTGAGCAAGGATATTTGAAGAAGTGTTCATGTGCACCT

L.usitatissimum-Lus10028862  
Textile-hemp-csa\_locus\_8286\_iso\_2\_len\_2019\_ver\_2  
H.lupulus-HL.SW.v1.0.G043506.1  
Marijuana-scaffold109107

TGACTTTGAATCTGAACCTTGGCCTAACATCTCCGAGAGTGTAAAGATTTAGTTAGGAA  
TGATTTTTCAACAGAACCGTGGCCTAGTATTTCTGAAGGTGCCAAGATTTAGTGGAGAA  
-----  
CGATTTTTCAACAGAACCGTGGCCTAGTATTTCTGAAGGTGCCAAGACTTAGTAGAGAA

L.usitatissimum-Lus10028862  
Textile-hemp-csa\_locus\_8286\_iso\_2\_len\_2019\_ver\_2  
H.lupulus-HL.SW.v1.0.G043506.1  
Marijuana-scaffold109107

AATGCTTTGTCGAGACCCAGAAAGCGACTAACTGCACATGAAGTTCTCTGCCATCCATG  
AATGCTTTATTCGAGACCCTAGGAGCGGATATCTGCACATGATGTTTTGTGCCATCCCTG  
-----  
AATGCTTTATTCGAGACCCTAGGAGCGGATATCTGCACATGATGTTTTGTGCCATCCCTG

L.usitatissimum-Lus10028862  
Textile-hemp-csa\_locus\_8286\_iso\_2\_len\_2019\_ver\_2  
H.lupulus-HL.SW.v1.0.G043506.1  
Marijuana-scaffold109107

GGTACAAGAAGAAGGTGTAGCTCTGACAAGCCTCTGATTCTGCGCTACTAAGTCGTTTT  
GGTTCAAGTTGGTGGTGGCTCTGACAAGCCTCTCGATTCTGCAATATTAAGTCGGTT  
-----  
GGTTCAAGTTGGTGGTGGCTCTGACAAGCCTCTCGATTCTGCAATATTAAGTCGGTT

L.usitatissimum-Lus10028862  
Textile-hemp-csa\_locus\_8286\_iso\_2\_len\_2019\_ver\_2  
H.lupulus-HL.SW.v1.0.G043506.1  
Marijuana-scaffold109107

GAAGCAATCTCGGCTATGAACAAGCTCAAGAAAATGGCTCTTATTATCATTGCTGAGAG  
GAAACAATCTCTGCAATGAACAAGCTTAAGAAAATGGCTATTAGAGTTATTGACAGAGAG  
-----  
GAAACAATCTCTGCAATGAACAAGCTTAAGAAAATGGCTATTAGAGTTATTGACAGAGAG

L.usitatissimum-Lus10028862  
Textile-hemp-csa\_locus\_8286\_iso\_2\_len\_2019\_ver\_2  
H.lupulus-HL.SW.v1.0.G043506.1  
Marijuana-scaffold109107

TTTATCCGAGAGAAATTCAGGCTGAAGGAGATGTTCAAGATGATAGATGCTGTAGG  
CTTATCTGAAGAAGAAATTCAGGCTGAAGGAAATTTCAAAATGATAGACACTGACAA  
-----  
CTTATCTGAAGAAGAAATTCAGGCTGAAGGAAATTTCAAAATGATAGACACTGACAA

L.usitatissimum-Lus10028862  
Textile-hemp-csa\_locus\_8286\_iso\_2\_len\_2019\_ver\_2  
H.lupulus-HL.SW.v1.0.G043506.1  
Marijuana-scaffold109107

AAGCGCCAGATCACATTCGAAGAACTCAAGCTGGACTAAAAAGATTGGTGTACTCT  
CAGTGGTTCATCACTTTTGAAGAACTTAAGGCTGGTCTGAAAAGATTGGAGCTAATCT  
-----  
CAGTGGTTCATCACTTTTGAAGAACTTAAGGCTGGTCTGAAAAGATTGGAGCTAATCT

L.usitatissimum-Lus10028862  
Textile-hemp-csa\_locus\_8286\_iso\_2\_len\_2019\_ver\_2  
H.lupulus-HL.SW.v1.0.G043506.1  
Marijuana-scaffold109107

CAAGGAATCAGAAATCTACGATTTAATGCAAGCGGCAGATATAGACAACAGTGGCACCAT  
TAAGGAATCCGAAATTTATGATTTAATGCAAGCAGCAGATGTAGATAACAGTGGAAACAAT  
-----  
TAAGGAATCCGAAATTTATGATTTAATGCAAGCAGCAGATGTAGATAACAGTGGAAACAAT

L.usitatissimum-Lus10028862  
Textile-hemp-csa\_locus\_8286\_iso\_2\_len\_2019\_ver\_2  
H.lupulus-HL.SW.v1.0.G043506.1  
Marijuana-scaffold109107

TGATTACGCCGAGTTCATCGCTGCAACCTGACCTGAAACAAAATCGAGAGAGAGATCA  
TGATTACGGAGAGTTTGTAGCAGCACTTTGCATTTAAACAAAATCGAGAGAGAGATCA  
-----  
TGATTACGGAGAGTTTGTAGCAGCACTTTGCATTTAAACAAAATCGAGAGAGAGATCA

L.usitatissimum-Lus10028862  
Textile-hemp-csa\_locus\_8286\_iso\_2\_len\_2019\_ver\_2  
H.lupulus-HL.SW.v1.0.G043506.1  
Marijuana-scaffold109107

TCTATTTGCAGCCTTTTCTACTTTCGACAAGGATGGAAGTGGTTACATCACTCAAGACGA  
TTTGTTCGCGCATTTCTACTTTTGATAAAGCAGGAGTGGCTACATTACTCAAGATGA  
-----  
TTTGTTCGCGCATTTTCTACTTTTGATAAAGCAGGAGTGGCTACATTACTCAAGATGA

L.usitatissimum-Lus10028862  
Textile-hemp-csa\_locus\_8286\_iso\_2\_len\_2019\_ver\_2  
H.lupulus-HL.SW.v1.0.G043506.1  
Marijuana-scaffold109107

GCTTCAACAAGCTTGCAGGAGTTTGGCCTACAAGACGTCGCTTGAAGAGATGATCAA  
GCTTCAACATGCTTGCAGGAGTTTGGGGTAGAGGACGTCGCGCTTGAAGAGATGATGCA  
-----  
GCTTCAACATGCTTGCAGGAGTTTGGGGTAGAGGACGTCGCGCTTGAAGAGATGATGCA

L.usitatissimum-Lus10028862  
Textile-hemp-csa\_locus\_8286\_iso\_2\_len\_2019\_ver\_2  
H.lupulus-HL.SW.v1.0.G043506.1  
Marijuana-scaffold109107

CGAAGCTGATCAGGACAATGACGGGCGCATAGATTACAACGAATTTGTGGCAGTATGCA  
AGAAGTTGATCAGGATAATGATGACGACATAGATTATAACGAGTTTGTGGCAGTATGCA  
-----  
AGAAGTTGATCAGGATAATGATGACGACATAGATTATAACGAGTTTGTGGCAGTATGCA

L.usitatissimum-Lus10028862  
Textile-hemp-csa\_locus\_8286\_iso\_2\_len\_2019\_ver\_2  
H.lupulus-HL.SW.v1.0.G043506.1

GAAAGGAAACCTAGCACCAACCCCGGAAAGGAAAGGACTAGAGACTAGCTTCAAGATGGC  
GAAAGGAACTATTGGT---GGCCCTGCTAAGAGGGGCTTACAAAATTCCTTCAAGATGGC  
-----

Marijuana-scaffold109107

GAAAGGAACTATTGGT---GGCCCTGCTAAGAAGGGCCTACAAAATTCCTTCAGCATTGC

L.usitatissimum-Lus10028862  
Textile-hemp-csa\_locus\_8286\_iso\_2\_len\_2019\_ver\_2  
H.lupulus-HL.SW.v1.0.G043506.1  
Marijuana-scaffold109107

GTTCAAAGATGCGCGGAAAATCAGCACCAGCAAGTAG  
TTTTAGAGAGGGTCGCAAACCTT-----  
-----  
TTTTAGAGAGGGTCGCAAACCTT-----

RAN

```

L.usitatissimum-Lus10025738
Marijuana-scaffold6813
Textile-hemp-csa_locus_1455_iso_4_len_1015_ver_2
H.lupulus-HL.SW.v1.0.G039301.1
-----
--AAAGTATAGCTTTCACACAGCAAAATATTTAACACTTTGGAGATCTGGAAGGATTC
CAAAAGTATAGCTTTCACACAGCAAAATATTTAACACTTTGGAGATCTGGAAGGATTC
-----

L.usitatissimum-Lus10025738
Marijuana-scaffold6813
Textile-hemp-csa_locus_1455_iso_4_len_1015_ver_2
H.lupulus-HL.SW.v1.0.G039301.1
-----
TCAATCTCTCTCTCTCTATATATTCTCCGGTAAGTTCTAGAGAGAGAAGGTGAAGTG
TCAATCTCTCTCTCTCTATATATTCTCCGGTAAGTTCTAGAGAGAGAAGGTGAAGTG
-----

L.usitatissimum-Lus10025738
Marijuana-scaffold6813
Textile-hemp-csa_locus_1455_iso_4_len_1015_ver_2
H.lupulus-HL.SW.v1.0.G039301.1
-----
-----ATGGC-----TGGGTATGGAGATCCTAGTCAGAAAGTGGATTATGCTTTTA
TGAAAATGGCAGCGGTGGAGGCTACGGCGATACGAGCCAGAAGATAGATTACGTGTTC
TGAAAATGGCAGCGGTGGAGGCTACGGCGATACGAGCCAGAAGATAGATTACGTGTTC
-----

L.usitatissimum-Lus10025738
Marijuana-scaffold6813
Textile-hemp-csa_locus_1455_iso_4_len_1015_ver_2
H.lupulus-HL.SW.v1.0.G039301.1
-----
AGGTGGTCTGATTGGAGACTCGGCGTGGGGAAGTCTCAGATACTTCTAGATTTTCGA
AGTTTGTGTGATCGGAGATTTCGGCGTGGGGAAGTACAGATTCTGGCTCGGTTTGTCTA
AGTTTGTGTGATCGGAGATTTCGGCGTGGGGAAGTACAGATTCTGGCTCGGTTTGTCTA
-----

L.usitatissimum-Lus10025738
Marijuana-scaffold6813
Textile-hemp-csa_locus_1455_iso_4_len_1015_ver_2
H.lupulus-HL.SW.v1.0.G039301.1
-----
GGAATGAGTTCAGTCTCGACTCCAAGGCCACCATCGGCGTTCGAGTTCAGACACGGACTA
GGAATGAGTTCAGTTCGACTCGAAAGCCACCATCGGCGTTCGAGTTCAGACTAGGACTC
GGAATGAGTTCAGTTCGACTCGAAAGCCACCATCGGCGTTCGAGTTCAGACTAGGACTC
-----

L.usitatissimum-Lus10025738
Marijuana-scaffold6813
Textile-hemp-csa_locus_1455_iso_4_len_1015_ver_2
H.lupulus-HL.SW.v1.0.G039301.1
-----
TGGTTATACAGCAAGAAGCGTCAAGGCTCAGATCTGGGATACCGCGGCCAAGAACGAT
TCGTCATCGAACACAAGAGTGTAAAGGCTCAGATCTGGGATCTCGAGCCAGGAACGAT
TCGTCATCGAACACAAGAGTGTAAAGGCTCAGATCTGGGATCTCGAGCCAGGAACGAT
-----GAT
***

L.usitatissimum-Lus10025738
Marijuana-scaffold6813
Textile-hemp-csa_locus_1455_iso_4_len_1015_ver_2
H.lupulus-HL.SW.v1.0.G039301.1
-----
ACAGAGCGGTACAAAGTCTTATTACAGAGGTGCGGTAGGGGCGATGTTGGTGTACGACA
ACAGAGCGGTGACGAGTGCATACTATAGGGGAGCTGTGGGGCAATGCTTGTATTGATA
ACAGAGCGGTGACGAGTGCATACTATAGGGGAGCTGTGGGGCAATGCTTGTATTGATA
ACAGGGCAATTACGAGTGCATATTATAGGGGAGCTGTGGGGCAATGCTTGTATTGATA
****.*** ** *.*****.*** ** *.***.*** ** *.*****.*** ** ** *
-----

L.usitatissimum-Lus10025738
Marijuana-scaffold6813
Textile-hemp-csa_locus_1455_iso_4_len_1015_ver_2
H.lupulus-HL.SW.v1.0.G039301.1
-----
TAACCAAGCGCCAGACCTTGTATCACATTCCGCGTGGTGAAGAGTTCAGTGTTCATG
TAACCAAGCGCCAGACCTTCGATCACATACCAGTTCGGTGAAGAGCTACGTAACCATG
TAACCAAGCGCCAGACCTTCGATCACATACCAGTTCGGTGAAGAGCTACGTAACCATG
TAACCAAGCGCCAGACCTTCGATCACATACCAGTTCGGTGAAGAGCTACGTAACCATG
*****.*** ** *.*****.*** ** *.***.*** ** *.*****.*** ** *
-----

L.usitatissimum-Lus10025738
Marijuana-scaffold6813
Textile-hemp-csa_locus_1455_iso_4_len_1015_ver_2
H.lupulus-HL.SW.v1.0.G039301.1
-----
CTGACAAGAATATTGTTATCATTCTGGTAGGGAACAAGTGTGATCTTGAGGAACAGAGAG
CTGACAAGAACATAGTCACTATTCTGATCGGAACAACAACTGATTCAGAGAACCAGCGTG
CTGACAAGAACATAGTCACTATTCTGATCGGAACAACAACTGATTCAGAGAACCAGCGTG
CTGACAAGAACATAGTCACTATTCTGATTGGAACAACAACTGATTCAGAGAACCAGCGTG
*****.*** ** *.*****.*** ** *.***.*** ** *.*****.*** ** *
-----

L.usitatissimum-Lus10025738
Marijuana-scaffold6813
Textile-hemp-csa_locus_1455_iso_4_len_1015_ver_2
H.lupulus-HL.SW.v1.0.G039301.1
-----
GAGTACCACAGAGGATGCCAAGGAATTTGCAGAGAAGGAGGTTTGTCTTCTCTAGAAA
CAGTCCCCTAGGAAGCGCCAAAGAAATTTGCCAGAAAGAGGGCTTTTCTTTTGGAGA
CAGTCCCCTAGGAAGCGCCAAAGAAATTTGCCAGAAAGAGGGCTTTTCTTTTGGAGA
CAGTCCCCTAGGAAGCGCTAAAGAAATTTGCTCAGAAAGAGGGCTTTTCTTTTGGAGA
****.*****.*** ** *.*****.*** ** *.***.*** ** *.*****.*** ** *
-----

L.usitatissimum-Lus10025738
Marijuana-scaffold6813
Textile-hemp-csa_locus_1455_iso_4_len_1015_ver_2
H.lupulus-HL.SW.v1.0.G039301.1
-----
CCTCCGCATTGAACGCCAATGTTGGAGAGTGCCTTTTCAACGGTATTGACGGAGATAT
CTTCAGCACTGGAATCACTAATGTCGAGAACCGCTTCTTGACCGTCTCAGAGATTT
CTTCAGCACTGGAATCACTAATGTCGAGAACCGCTTCTTGACCGTCTCAGAGATTT
CTTCAGCACTGGAATCACTAATGTCGAGAACCGCTTCTTGACCGTCTCAGAGATTT
* **.* ** *.*** ** *.*****.*** ** *.***.*** ** *.*****.*** ** *
-----

L.usitatissimum-Lus10025738
Marijuana-scaffold6813
Textile-hemp-csa_locus_1455_iso_4_len_1015_ver_2
H.lupulus-HL.SW.v1.0.G039301.1
-----
TCAACATTGTAAACAAAAGAGCTTGACAGCTGATGAGAATCAAGGCAACGGTAAACCTG
TCAACATTGTGAACAAGAAGAACCTTGGCGTGTGAAAACCAAGGAATGGTAAACCTG
TCAACATTGTGAACAAGAAGAACCTTGGCGTGTGAAAACCAAGGAATGGTAAACCTG
TCAACATTGTGAACAAGAAGAACCTTGGCTGTGAAAACCAAGGAATGGTAAACCTG
*****.*** ** *.***.*** ** *.*****.*** ** *.***.*** ** *.*****.*** ** *
-----

L.usitatissimum-Lus10025738
Marijuana-scaffold6813
Textile-hemp-csa_locus_1455_iso_4_len_1015_ver_2
H.lupulus-HL.SW.v1.0.G039301.1
-----
GTCATTAGCTGGTGAAGAAATCTGGTGCAGGCCCTGCACAAGTAATCCAGCAAAGA
CATCCCTTACTGGCAAGAAGATCATCGTCCGGCCCTGCACAAGTTATCCCTGAAAAGA
CATCCCTTACTGGCAAGAAGATCATCGTCCGGCCCTGCACAAGTTATCCCTGAAAAGA
CATCCCTTACTGGCAAGAAGATCATCGTCCAGGCTCTGCACAGTTATCCAGAAAAGA
* **.* ** *.*** ** *.***.*** ** *.*****.*** ** *.***.*** ** *.*****.*** ** *
-----

L.usitatissimum-Lus10025738
Marijuana-scaffold6813
Textile-hemp-csa_locus_1455_iso_4_len_1015_ver_2
H.lupulus-HL.SW.v1.0.G039301.1
-----
GAAACATGTGTTGCACCTCATCGTGA-----
ACAAGATGTGTTGTACATCATCGTGTCTAATCTTTTGACAAAAGTGG-TCTCAAATACA
ACAAGATGTGTTGTACATCATCGTGTCTAATCTTTTGACAAAAGTGG-TCTCAAATACA
ACAAGATGTGTTGTACATCATCGTGTCTAATC-TTTGCACAAAAGTGGATCTCAAATACA
..* **.* ** *.*** ** *.***.*** ** *.*****.*** ** *.***.*** ** *.*****.*** ** *
-----

L.usitatissimum-Lus10025738
Marijuana-scaffold6813
Textile-hemp-csa_locus_1455_iso_4_len_1015_ver_2
H.lupulus-HL.SW.v1.0.G039301.1
-----
AGATTCTGTTTTCAAATCTCAAATAGCAATTTTGTGATGGTGGTGTTTTTTCATT
AGATTCTGTTTTCAAATCTCAAATAGCAATTTTGTGATGGTGGTGTTTTTTCATT
AGATTCTGTTTTCAAATCTCAAATAGCAATTTTGTGATGGTGGTGTTTTTTCATT
-----

L.usitatissimum-Lus10025738
Marijuana-scaffold6813
Textile-hemp-csa_locus_1455_iso_4_len_1015_ver_2
H.lupulus-HL.SW.v1.0.G039301.1
-----
TGATATTTTTACATGTTTTAGCCTTGTAGTTGCATGGGCGGCCAAGCTCTTGCTCaT
TGATATTTTTACATGTTTTAGCCTTGTAGTTGCATGGGCGGCCAAGCTCTTGCTCGT
TGATATGTTTTACATGTTTTAGCCTTGTAGTTGGATGGGCGGCCAAGCTCTTGCTCGT
-----

L.usitatissimum-Lus10025738
Marijuana-scaffold6813
Textile-hemp-csa_locus_1455_iso_4_len_1015_ver_2
H.lupulus-HL.SW.v1.0.G039301.1
-----
TATGATAAGGAAAGAAAGAACTA-AGTTGAAGTTGAGTTGCA-----
TATGATAAGGAAAGAAAGAACTA-AGTTGAAGTTGAGTTGCAAGATCGAAGAGCGGTT
TATGACAAGGAAAGAAAGAACTAAGTTGAAGTTGAGTTGCA-----

```

Clathrin

L.usitatissimum-Lus10040086  
 Marijuana-scaffold38061  
 Textile-Hemp-csa\_locus\_5464\_iso\_6\_len\_1880\_ver\_2  
 H.lupulus-HL.SW.v1.0.G042778.1  
 -----  
 ACAAAAcaaatACAACtCAactcttCTCTTCTCCATTTCTGCTTTGTGAATTTCTT  
 -----ACAAAAACAACtCAACTCTTCTCTCCATTTCTGCTTTGTGAATTTCTT  
 -----

L.usitatissimum-Lus10040086  
 Marijuana-scaffold38061  
 Textile-Hemp-csa\_locus\_5464\_iso\_6\_len\_1880\_ver\_2  
 H.lupulus-HL.SW.v1.0.G042778.1  
 -----  
 CCATTTCTCCCTTACCAAGAAAGCAGAGATCAAATCAAATAGATAGGCCATCCATCTTT  
 CCATTTCTCCCTTACCAAGAAAGCAGAGATCAAATCAAATAGATAGGCCATCCATCTTT  
 -----

L.usitatissimum-Lus10040086  
 Marijuana-scaffold38061  
 Textile-Hemp-csa\_locus\_5464\_iso\_6\_len\_1880\_ver\_2  
 H.lupulus-HL.SW.v1.0.G042778.1  
 -----  
 CAAATCTTACGTCCAGATCGCAACTACTCCGCCCTAGATCTGATTCcGGACGCCACCCAC  
 CAAATCTTACGTCCAGATCGCAACTACTCCGCCCTAGATCTGATTCGGACGCCACCCAC  
 -----

L.usitatissimum-Lus10040086  
 Marijuana-scaffold38061  
 Textile-Hemp-csa\_locus\_5464\_iso\_6\_len\_1880\_ver\_2  
 H.lupulus-HL.SW.v1.0.G042778.1  
 -----  
 -----ATGCCGGTAGCTGCTTCAGCTCTCTATTTCTTGAACCTCCGCGGCGATGT  
 TGGATCCGTCATGCCGGTGGCTGCTCCGCCATTACTTCTTGAACCTCCGAGGCGATGT  
 TGGATCCGTCATGCCGGTGGCTGCTCCGCCATTACTTCTTGAACCTCCGAGGCGATGT  
 -----

L.usitatissimum-Lus10040086  
 Marijuana-scaffold38061  
 Textile-Hemp-csa\_locus\_5464\_iso\_6\_len\_1880\_ver\_2  
 H.lupulus-HL.SW.v1.0.G042778.1  
 -----  
 CCTCATCAATCGTCTCTACCGCGAGATGTTGGGGAAATATGGTGTGCGTTCGGGAT  
 TCTCATCAATCGTCTCTACCGCGAGATGTTGGGGAAATATGGTGTGCGTTCGGGAT  
 TCTCATCAATCGTCTCTACCGCGAGATGTTGGGGAAATATGGTGTGCGTTCGGGAT  
 -----

L.usitatissimum-Lus10040086  
 Marijuana-scaffold38061  
 Textile-Hemp-csa\_locus\_5464\_iso\_6\_len\_1880\_ver\_2  
 H.lupulus-HL.SW.v1.0.G042778.1  
 -----  
 GCATATATGTCAGACGAAGAACTTGGGACATGCCCTGTGCGTCAAATGGAGGCTGTTT  
 GCATATAATGCAAACAAAGAACTTGGTACATGTCCTGTACGACAAATAGGGGGATGTTT  
 GCATATAATGCAAACAAAGAACTTGGTACATGTCCTGTACGACAAATAGGGGGATGTTT  
 -----

L.usitatissimum-Lus10040086  
 Marijuana-scaffold38061  
 Textile-Hemp-csa\_locus\_5464\_iso\_6\_len\_1880\_ver\_2  
 H.lupulus-HL.SW.v1.0.G042778.1  
 -----  
 ATTTCTTTATATGAGGATCAGCAACGCTACATTGTGGTTGAGTGTGAGCAGCAATGCTAA  
 TTTCTTTACATGAGAATAAGCAACGTgTACATTGTGATTTGTGTCAGCAGCAATGCAAA  
 TTTCTTTACATGAGAATAAGCAACGTTTACATTGTGATTTGTGTCAGCAGCAATGCAAA  
 -----

L.usitatissimum-Lus10040086  
 Marijuana-scaffold38061  
 Textile-Hemp-csa\_locus\_5464\_iso\_6\_len\_1880\_ver\_2  
 H.lupulus-HL.SW.v1.0.G042778.1  
 -----  
 TGTGTCTGTGCATTCAAATTTGTGGTAGAGGCTGTGCACTATTCAAGTCATATCTCCG  
 TGTAGCTTGTGCGTTCAAGTTTGTGTTGAGGCGGTTGCGTGTGTTCAAATCATATTTTGG  
 TGTAGCTTGTGCGTTCAAGTTTGTGTTGAGGCGGTTGCGTGTGTTCAAATCATATTTTGG  
 -----

L.usitatissimum-Lus10040086  
 Marijuana-scaffold38061  
 Textile-Hemp-csa\_locus\_5464\_iso\_6\_len\_1880\_ver\_2  
 H.lupulus-HL.SW.v1.0.G042778.1  
 -----  
 TGGTGCATTTGATGAAGATGCTATCAGAAATAATTTGTTTTGATATACGAGTTGCTTGA  
 TGGGGCTTTTGTATGAAGATGCAATTCGTAATAATTTTGTTCGATTTATGAACGTTTGA  
 TGGGGCTTTTGTATGAAGATGCAATTCGTAATAATTTTGTTCGATTTATGAACGTTTGA  
 -----

L.usitatissimum-Lus10040086  
 Marijuana-scaffold38061  
 Textile-Hemp-csa\_locus\_5464\_iso\_6\_len\_1880\_ver\_2  
 H.lupulus-HL.SW.v1.0.G042778.1  
 -----  
 TGAGATCATGGACTTTGGATATCCACAGAATTTGCTCTCCTGAGATATTAAAGCTATACAT  
 TGAATTTATGGATTTGGTTACCCCAAATCTTCCACAGAAATTTGAAGTTGTACAT  
 TGAATTTATGGATTTGGTTACCCCAAATCTTCCACAGAAATTTGAAGTTGTACAT  
 -----

L.usitatissimum-Lus10040086  
 Marijuana-scaffold38061  
 Textile-Hemp-csa\_locus\_5464\_iso\_6\_len\_1880\_ver\_2  
 H.lupulus-HL.SW.v1.0.G042778.1  
 -----  
 TACTCAAGAAGGAGTGCAGTCCACATTTTCTCAAGCAAGCTTTGGATAAGCCTGTACC  
 TACTCAAGAAGGAGTGCAGTCCACATTTTCTCAAGCC--ACGGATAAGCCTGTACC  
 TACTCAAGAAGGAGTGCAGTCCACATTTTCTCAAGCC--ACGGATAAGCCTGTACC  
 -----

L.usitatissimum-Lus10040086  
 Marijuana-scaffold38061  
 Textile-Hemp-csa\_locus\_5464\_iso\_6\_len\_1880\_ver\_2  
 H.lupulus-HL.SW.v1.0.G042778.1  
 -----  
 AAATGCCACATTTGCAAGTTACAGGGGCTGTTGGTTGGCGAAGGAAGGACTCGTATACAA  
 TAATGCAACTCTACAAGTTACGGGTGCTGTTGGTTGGCGGAGAGAAGGCTTTGTTTATA  
 TAATGCAACTCTACAAGTTACGGGTGCTGTTGGTTGGCGGAGAGAAGGCTTTGTTTATA  
 -----

L.usitatissimum-Lus10040086  
 Marijuana-scaffold38061  
 Textile-Hemp-csa\_locus\_5464\_iso\_6\_len\_1880\_ver\_2  
 H.lupulus-HL.SW.v1.0.G042778.1  
 -----  
 AAAGAACGAGGTTTTCTGGATATTGGGAAAGCGTTAATCTTCTATGTCTCCAAAGG  
 AAAGAATGAGGTTTTTGGATATTGGGAAAGTGAATCTTCTATGTCTCCAAAGG  
 AAAGAATGAGGTTTTTGGATATTGGGAAAGTGAATCTTCTATGTCTCCAAAGG  
 -----

L.usitatissimum-Lus10040086  
 Marijuana-scaffold38061  
 Textile-Hemp-csa\_locus\_5464\_iso\_6\_len\_1880\_ver\_2  
 H.lupulus-HL.SW.v1.0.G042778.1  
 -----  
 TAGTGTACTACGTGTGATGTAACGGGAAGATCTGATGAAGTCTCTCTCCGGAAT  
 TAGTGTGTTGCGTTGTGATGTAACGGGAAGATCTAATGAAGTCTCTCTCCGGAAT  
 TAGTGTGTTGCGTTGTGATGTAACGGGAAGATCTAATGAAGTCTCTCTCCGGAAT  
 -----

L.usitatissimum-Lus10040086  
 Marijuana-scaffold38061  
 Textile-Hemp-csa\_locus\_5464\_iso\_6\_len\_1880\_ver\_2  
 H.lupulus-HL.SW.v1.0.G042778.1  
 -----  
 GCCTGATTTGAAGTTGGGTTTAAACGATAAAATGGCCCTTGAGAAAGAGTCACAACCTAA  
 CCTGATTTGAAGTTGGGTTTAAATGATAAGATGGCCCTTGAAAGAGTCACAACCTAA  
 GCCTGATTTGAAGTTGGGTTTAAATGATAAGATGGCCCTTGAAAGAGTCACAACCTAA  
 -----

L.usitatissimum-Lus10040086  
 Marijuana-scaffold38061  
 Textile-Hemp-csa\_locus\_5464\_iso\_6\_len\_1880\_ver\_2  
 H.lupulus-HL.SW.v1.0.G042778.1  
 -----  
 GAACCGTCCCACTAAAAGTGGTAAACAATGAGCTGTGATGTTACTTTCCATCAATG  
 ATCTCGTCCCACTAAAAGTGGTAAACAATGAGCTGTGATGTTACTTTCCATCAATG  
 ATCTCGTCCCACTAAAAGTGGTAAACAATGAGCTGTGATGTTACTTTCCATCAATG  
 -----

L.usitatissimum-Lus10040086  
 Marijuana-scaffold38061  
 Textile-Hemp-csa\_locus\_5464\_iso\_6\_len\_1880\_ver\_2  
 H.lupulus-HL.SW.v1.0.G042778.1  
 -----  
 CGTGAACCTTAAACAAGGTTCAACTCGGAGAAGACAGTTAGTTTGTCCACCTGATGGTGA  
 TGTGAACCTTGAAGGTTTAAATCGGAGAAAACGTGAGTTTGTGCCACAGATGGTGA  
 TGTGAACCTTGAAGGTTTAAATCGGAGAAAACGTGAGTTTGTGCCACAGATGGTGA  
 -----



```

L.usitatissimum-Lus10040086
Marijuana-scaffold38061
Textile-Hemp-csa_locus_5464_iso_6_len_1880_ver_2
H.lupulus-HL.SW.v1.0.G042778.1
ATTTGAATTGATGAAGTACCGCATCACAGAGGGGTTAATCTACCATTGAGGTATTACC
ATTTGAATTGATGAAGT-----ATGAAGGTGAATCTTCCATTCCGAGTGTGCC
ATTTGAATTGATGAAGTACCGTATTACTGAAGGTGAATCTTCCATTCCGAGTGTGCC
-----

L.usitatissimum-Lus10040086
Marijuana-scaffold38061
Textile-Hemp-csa_locus_5464_iso_6_len_1880_ver_2
H.lupulus-HL.SW.v1.0.G042778.1
AACCATTAAGGAACATGGCCGAACACGATGGAAGTGAATGTCAAGGTAAAGAGCGTTT
TACTATCAAGGAACCTGGTAGAACACCGCATGGAGTAAATGTCAAGGTGAAGAGTGTCTT
TACTATCAAGGAACCTGGTAGAACACCGCATGGAAGTAAATGTCAAGGTGAAGAGTGTCTT
-----

L.usitatissimum-Lus10040086
Marijuana-scaffold38061
Textile-Hemp-csa_locus_5464_iso_6_len_1880_ver_2
H.lupulus-HL.SW.v1.0.G042778.1
TGGGGCGAAAAATGTTTGTCTTGGTGTGGTAATCAAAATCCCTGTACCAAAACAAACAGC
TGGTGCAAAAATGTTGCACTTGGGGTTGTCAATAAAAATCCCCGTACCAAAACAAACAGC
TGGTGCAAAAATGTTGCACTTGGGGTTGTCAATAAAAATCCCCGTACCAAAACAAACAGC
-----

L.usitatissimum-Lus10040086
Marijuana-scaffold38061
Textile-Hemp-csa_locus_5464_iso_6_len_1880_ver_2
H.lupulus-HL.SW.v1.0.G042778.1
TAAAAACAGCTTCCAAGTGACGTGAGGACGGGCAAGTACAATGCGTCAATTGATTGCTT
TAAAAACAGCTTCCAAGTTACATCTGGTGCATGTAATATAATGACGCTATTGATTGCTT
TAAAAACAGCTTCCAAGTTACATCTGGTGCATGTAATATAATGACGCTATTGATTGCTT
-----

L.usitatissimum-Lus10040086
Marijuana-scaffold38061
Textile-Hemp-csa_locus_5464_iso_6_len_1880_ver_2
H.lupulus-HL.SW.v1.0.G042778.1
GGTCTGGAAGATAAAGAAGTTTCCAGTGCAGACTGACCAACCTTGATGTCAGAAGTTGA
AGTCTGGAAGATAAAGAAAATTTCTGGGCAAACTGACCAACAATGAGTGCAGAGTTGA
AGTCTGGAAGATAAAGAAAATTTCTGGGCAAACTGACCAACAATGAGTGCAGAGTTGA
-----

L.usitatissimum-Lus10040086
Marijuana-scaffold38061
Textile-Hemp-csa_locus_5464_iso_6_len_1880_ver_2
H.lupulus-HL.SW.v1.0.G042778.1
GTTGATTTCTACAATTGCAGATAAGAAGTCTTGGACACGACCCCAATTCAAATGGAGTT
GCTGATTTGCACAATGACAGAAAAGAAGTCTGGACACGGCCACCAATTCAGATGGAAAT
GCTGATTTGCACAATGACAGAAAAGAAGTCTGGACACGGCCACCAATTCAGATGGAAAT
-----

L.usitatissimum-Lus10040086
Marijuana-scaffold38061
Textile-Hemp-csa_locus_5464_iso_6_len_1880_ver_2
H.lupulus-HL.SW.v1.0.G042778.1
CCAGGTCCCCATGTTTACAGCATCTGGATTGCGTGTGAGATTCTTAAAGTGTGGGAGAA
CCAGGT-----AGTtaTGGGAGAA
CCAGGTTCCAATGTTTACAGCATCTGGTCTTGCAGTACGATTCTTAAAGTGTGGGAGAA
-----AGTtaTGGGAGAA
****.*****

L.usitatissimum-Lus10040086
Marijuana-scaffold38061
Textile-Hemp-csa_locus_5464_iso_6_len_1880_ver_2
H.lupulus-HL.SW.v1.0.G042778.1
GAGTGGTTACAACACTGTGAGTGGGTTGCTACATTACAAAAGCAGGATCTTACGAGAT
GAGTGGATACAACACAGTTGAGTGGGTTGCTATATCACGAAAAGCTGGTTCATACGAAAT
GAGTGGATACAACACAGTTGAGTGGGTTGCTATATCACGAAAAGCTGGTTCATACGAAAT
GAGTGGATACAACACAGTTGAGTGGGTTGCTATATCACGAAAAGCTGGTTCATACGAAAT
*****.*****.* ***** ** *.*****.* ** *.*****.*

L.usitatissimum-Lus10040086
Marijuana-scaffold38061
Textile-Hemp-csa_locus_5464_iso_6_len_1880_ver_2
H.lupulus-HL.SW.v1.0.G042778.1
TAGTGCTAG-----
TAGTGCTAAAAACATTTCGCGTAAATGGTGAAGAATTGAGATATTTGAGTTTGGAGATC
TAGTGCTAAAAACATTTCGCGTAAATGGTGAAGAATTGAGATATTTGAGTTTGGAGATC
TAGTGCTAAAAACATTTCGCGTAAATGGTGAAGAATTGAGATATTTGAGTTTGGAGATC
*****.

L.usitatissimum-Lus10040086
Marijuana-scaffold38061
Textile-Hemp-csa_locus_5464_iso_6_len_1880_ver_2
H.lupulus-HL.SW.v1.0.G042778.1
TACAAATTTGGTTATTGGATCAGAAAATGTTGCTAAGACATTAGGAATATTTTTTCTT
TACAAATTTGGTTATTGGATCAGAAAATGTTGCTAAGACATTAGGAATATTTTTTCTT
TATAAATTTGTTATTGATCAGAAAAGTTGTTGCTTAGCAATAAATCAT--TAGGGCA-
-----

L.usitatissimum-Lus10040086
Marijuana-scaffold38061
Textile-Hemp-csa_locus_5464_iso_6_len_1880_ver_2
H.lupulus-HL.SW.v1.0.G042778.1
TTTGGGTTTGGTGTGTGGTTATAGTGTATGTCGATATGATT---GTGTTTCACTACT
TTTGGGTTTGGTGTGTGGTTATAGTGTATGTCGATATGATT---GTGTTTCACTACT
---TTTTTGTGTGTGGTTATAGTGTATGTCGATATGATTGTTGTGTTAATTACT
-----

L.usitatissimum-Lus10040086
Marijuana-scaffold38061
Textile-Hemp-csa_locus_5464_iso_6_len_1880_ver_2
H.lupulus-HL.SW.v1.0.G042778.1
TTTtGTTGATATTTGTTGTAATGCTAGCTATTTTTTTaCCCATATCCTTTTACAACF
T-TTGGTTGATATTTGTTGTAATGCTAGCTATTTTTTTCCCATATCCTTTTACAACF
T-TTGGTTGATATCTTGTGTAATGCTAGCTATTTTTTTCC--ATCCTCTTACAACF
-----

L.usitatissimum-Lus10040086
Marijuana-scaffold38061
Textile-Hemp-csa_locus_5464_iso_6_len_1880_ver_2
H.lupulus-HL.SW.v1.0.G042778.1
GgCAATaTGAGAAATCTTTGATCTGTTcTTTTCTAGAGATGGATTTGTTTCATTCATGGT
GCCAATGTGAGAAATCTTTGATCTGTTATTTCTAGAGATGGATTTGTTTCATTCATGGT
GGCCATGTGAGAAATCTTTGATCTGCCATTTT-----GGAGA-CCAACTTCTTGGT
-----

L.usitatissimum-Lus10040086
Marijuana-scaffold38061
Textile-Hemp-csa_locus_5464_iso_6_len_1880_ver_2
H.lupulus-HL.SW.v1.0.G042778.1
TTGCATTGGCAAAAAT---CAGTTGTAGTGACAAAACTTGTAAGTGAAGAATACTTGA
TTGCATTGGCAAAAAT---CAGTTGTAGTGACAAAAGTTGTAAGTGAAGAATACTTGA
TTGAATTTGGCAAAAATCTGCTGTTGTAGTGACAAAATTCGGAGTGAAGAATACTTGA
-----

L.usitatissimum-Lus10040086
Marijuana-scaffold38061
Textile-Hemp-csa_locus_5464_iso_6_len_1880_ver_2
H.lupulus-HL.SW.v1.0.G042778.1
CTTGAGATATATAGTTTGGCTTTGCTTTA-----
CTTGAGATATATAGTTTGGCTTTGCTTTA-----
CTTGAGATAT---AGTTTGGCTTTG-----

```



H. lupulus-HL.SW.v1.0.G001325.1
L.usitatissimum-LUS10031955
Textile-hemp-csa\_locus\_16122\_iso\_2\_len\_2075\_ver\_2
Marijuana-scaffold20047

GGTTCTTCTGGTGGTCTGTTTGGCTTTCTGGGCTTGATGCGCTAACCGTTCAAACCTTTA
GGTTCTTCTGGGCGGACTCGTTTGGCTTTCCGGAAGCTCGATGGGTTGACTTTCAAGTCATTG
GGTTCTTCTGGTGGTCTAATTTGCTTTTCTGGGCTAGATGGGCTAACTTTCAGAACTTTA
GGTTCTTCTGGTGGTCTAATTTGCTTTTCTGGGCTAGATGGGCTAACTTTCAGAACTTTA
\*\*\*\*\* \*\* \*\*:\* .\*\*\*\*\* \*\* \*\* \* \*\* \*\* \* .\*\* \*\* \*\* .:;\* \*\*

H. lupulus-HL.SW.v1.0.G001325.1
L.usitatissimum-LUS10031955
Textile-hemp-csa\_locus\_16122\_iso\_2\_len\_2075\_ver\_2
Marijuana-scaffold20047

GTTTGAATCCACTCACAAAACCTGGAGATCTCTACCAAATATGCAATFACAATCAGCAA
GTTTGAATCCCTTGAAGTACGATGGAGGACTTCCAGCATGCAACAATCAGCAG
GTTTGAATCCACTCACAAAACCTGGAGGCTCTACCAACTATGCAATFACAACAGCAA
GTTTGAATCCACTCACAAAACCTGGAGGCTCTACCAACTATGCAATFACAACAGCAA
\*\*\*\*\* \*\* \*\*:\* .\*\*\*\*\* \*\* \*\* \* \*\* \*\* \* .\*\* \*\* \*\* .:;\* \*\*

H. lupulus-HL.SW.v1.0.G001325.1
L.usitatissimum-LUS10031955
Textile-hemp-csa\_locus\_16122\_iso\_2\_len\_2075\_ver\_2
Marijuana-scaffold20047

AGACAGCTGATCATGGTTGTTGATCGTAAACATCGGTCATTAAAGTTATAGCCACAAGT
AGACAGTTGATATTTGGTGGTGGTCTCGGACCGGTCGTTCAAAGTATAGTACCAGC
AGACAGCTGATCATGGTTGTTGATCGTAAACATCGGTCATTAAAGTTATAGCCACAAGT
AGACAGCTGATCATGGTTGTTGATCGTAAACATCGGTCATTAAAGTTATAGCCACAAGT
\*\*\*\*\* \*\* \*\*:\* .\*\*\*\*\* \*\* \*\* \* \*\* \*\* \* .\*\* \*\* \*\* .:;\* \*\*

H. lupulus-HL.SW.v1.0.G001325.1
L.usitatissimum-LUS10031955
Textile-hemp-csa\_locus\_16122\_iso\_2\_len\_2075\_ver\_2
Marijuana-scaffold20047

GACATTTATGGTGACAAATCATTACCACCGAAGTGTATGATTCAAAGCTAAATAGTTGG
GATGTTTATGGCGATAAATCGTTGCCTACCGAAGTGTACGATTGCAAACTCAGCAGG
GATTTTACCGTGACAAATCATTACCACCGAAGTGTATGATTCAAAGCTAAATAGTTGG
GATTTTACCGTGACAAATCATTACCACCGAAGTGTATGATTCAAAGCTAAATAGTTGG
\*\* .\*\*\*\* \*\* \*\* \* \*\* \*\* \* .\*\* \*\* \*\* .:;\* \*\*

H. lupulus-HL.SW.v1.0.G001325.1
L.usitatissimum-LUS10031955
Textile-hemp-csa\_locus\_16122\_iso\_2\_len\_2075\_ver\_2
Marijuana-scaffold20047

TCCTTCCACAGATAATGCCAGCAGTTAATCTTTGCTCCTCAAAGATGGCTTATTGTGAC
GTTGTTTATCAGATTATGCTTCCGCTTAATCTATGCTCCTCGAAGATGGCTATTGGCAG
TTCCCTTCCACAGATAATGCCAGCAGTTAATCTTTGCTCCTCGAAGATGGCTATTGTGAT
TTCCCTTCCACAGATAATGCCAGCAGTTAATCTTTGCTCCTCGAAGATGGCTATTGTGAT
\*\*\*\* \*\* \*\*:\* .\*\*\*\*\* \*\* \*\* \* \*\* \*\* \* .\*\* \*\* \*\* .:;\* \*\*

H. lupulus-HL.SW.v1.0.G001325.1
L.usitatissimum-LUS10031955
Textile-hemp-csa\_locus\_16122\_iso\_2\_len\_2075\_ver\_2
Marijuana-scaffold20047

TCCAGGTTGATTTAGAACTCTTTCCGCACTCGGTTGATGATGATAGACTGGACACT
TCGAGATTATACCTCGAGACTCTTTCCGCTCGGTTGATGATGATAAGCTCGACAG
TCCAGATTGATTTAGAAACCTTTCCGCACTAGGATTGATGATGATAAAGCTGGACACT
TCCAGATTGATTTAGAAACCTTTCCGCACTAGGATTGATGATGATAAAGCTGGACACT
\*\* \*\* \*\*.\* \*\* \*\* .: \* \*\* \*\* \* .\*\* \*\* \*\* .:\*\*\*\*\* \*\* \*\* \* \*\* \*\* \* .\*\* \*\* \*\* .:;\* \*\*

H. lupulus-HL.SW.v1.0.G001325.1
L.usitatissimum-LUS10031955
Textile-hemp-csa\_locus\_16122\_iso\_2\_len\_2075\_ver\_2
Marijuana-scaffold20047

GGTTACTGGGAACACATTTCATGCTAAATCCCAAGTCTTACTGGATGGCTACTTGGTT
GGTTACTGGGAGCATATTCCTGCGAAGTTCCAGGCTCTCTGTTGGATGGATCTGGTG
GGATATTTGGGAACACATTTCCTGCTAAATCCCAAGTCTTACTGGATGGCTACTTGGTT
GGATATTTGGGAACACATTTCCTGCTAAATCCCAAGTCTTACTGGATGGCTACTTGGTT
\*\* \*\* \*\*.\* \*\* \*\* .: \* \*\* \*\* \* .\*\* \*\* \*\* .:\*\*\*\*\* \*\* \*\* \* \*\* \*\* \* .\*\* \*\* \*\* .:;\* \*\*

H. lupulus-HL.SW.v1.0.G001325.1
L.usitatissimum-LUS10031955
Textile-hemp-csa\_locus\_16122\_iso\_2\_len\_2075\_ver\_2
Marijuana-scaffold20047

GCTGGCACACAGAAGCGTCTATTTTGTGGACGCGTCTTTACAGTACTCTTCAA
GCTGGAACCCAGAAGCGTCTATTTTGTGGGAGAAATCGGCTATATAGTACGCTTCAG
GCTGGCACACAGAAGCGTCTATTTTGTGGACGCGTCTTCTATAGTACTCTTCAA
GCTGGCACACAGAAGCGTCTATTTTGTGGACGCGTCTTCTATAGTACTCTTCAA
\*\*\*\* \*\* \*\*.\* \*\* \*\* .: \* \*\* \*\* \* .\*\* \*\* \*\* .:\*\*\*\*\* \*\* \*\* \* \*\* \*\* \* .\*\* \*\* \*\* .:;\* \*\*

H. lupulus-HL.SW.v1.0.G001325.1
L.usitatissimum-LUS10031955
Textile-hemp-csa\_locus\_16122\_iso\_2\_len\_2075\_ver\_2
Marijuana-scaffold20047

AGTATGAGAATTTGGGAATGGATCATGCGAAAATATGTTGGGTGGAGATCAGTAGAATG
AGTATGAGGATTTGGGAGTTGGATCATGCGAAGAACTTGTGGCTAGAGATTAGTAGAATG
AGTATGAGAATTTGGGAATGGATCATGCGAAAATATGTTGGGTGGAGATTAGTAGAATG
AGTATGAGGATTTGGGAGTTGGATCATGCGAAAATATGTTGGGTGGAGATTAGTAGAATG
\*\*\*\*\* .\*\*\*\*\* .\*\*\*\*\* .\*\* .:\*\*\*\* \* .\*\*\*\*\* \*\* \*\* .\*\*

H. lupulus-HL.SW.v1.0.G001325.1
L.usitatissimum-LUS10031955
Textile-hemp-csa\_locus\_16122\_iso\_2\_len\_2075\_ver\_2
Marijuana-scaffold20047

CCACCAAGTATTTTCGAGCACTGTTAAGATATCTGCTGAGAGATTGAGTGTCTTGGGA
CCACCAAGTATTTTCGAGCACTGTTAAGATATCTGCTGAGAGATTGAGTGTCTTGGGA
CCACCAAGTATTTTCGAGCACTGTTAAGATATCTGCTGAGAGATTGAGTGTCTTGGGA
CCACCAAGTATTTTCGAGCACTGTTAAGATATCTGCTGAGAGATTGAGTGTCTTGGGA
\*\*\*\*\* .\*\*\*\*\* .\*\* .: \* \*\* \*\* \* .\*\* \*\* \*\* .:\*\*\*\*\* \*\* \*\* \* \*\* \*\* \* .\*\* \*\* \*\* .:;\* \*\*

H. lupulus-HL.SW.v1.0.G001325.1
L.usitatissimum-LUS10031955
Textile-hemp-csa\_locus\_16122\_iso\_2\_len\_2075\_ver\_2
Marijuana-scaffold20047

CAGGATAACTTAATCTGCTTTACCTCTTGGAAATCAAGGGAAGGGCTTATTGATGATGTG
CAGGATAACTTATGATGTTTCAATCTAGGAAACCAAGGGAAGGGCTTATTGATGATGTG
CAGGATAACTTATCTGCTTTACATCTTGGAAATCAAGGGAAGGGCTTATTGATGATGTG
CAGGATAACTTAACTGCTTTACATCTTGGAAATCAAGGGAAGGGCTTATTGATGATGTG
\*\*\*\*\* .\*\*\*\*\* .\*\* .: \* \*\* \*\* \* .\*\* \*\* \*\* .:\*\*\*\*\* \*\* \*\* \* \*\* \*\* \* .\*\* \*\* \*\* .:;\* \*\*

H. lupulus-HL.SW.v1.0.G001325.1
L.usitatissimum-LUS10031955
Textile-hemp-csa\_locus\_16122\_iso\_2\_len\_2075\_ver\_2
Marijuana-scaffold20047

GATAAAAAGGCTTGGTCTTGGATAGGTGGATGTGCTCTGCAGTCTTACAACAGCCAGGTT
GATAAAGAGGTTGTTGCTGGATCGGAGGATGCTCTTGAATCATATAACAGCCAGGTT
GATAAAAAGTCTTGGTCTTGGATAGGTGGATGTGCTCTGCAGTCTTACAACAGCCAGGTT
GATAAAAAGTCTTGGTCTTGGATAGGTGGATGTGCTCTGCAGTCTTACAACAGCCAGGTT
\*\*\*\*\* .\*\* \*\* \* \*\* \*\* \* .\*\* \*\* \*\* .:\*\*\*\*\* \*\* \*\* \* \*\* \*\* \* .\*\* \*\* \*\* .:;\* \*\*

H. lupulus-HL.SW.v1.0.G001325.1
L.usitatissimum-LUS10031955
Textile-hemp-csa\_locus\_16122\_iso\_2\_len\_2075\_ver\_2
Marijuana-scaffold20047

TGTTTTATGAGCCAAGATTTGATGCTTCCATCTTTAATAGGAAATTTGCTCTGCGGG
TGCTTCTATGAGCTAGATTGATGCTTCAATCTATTGA-----
TGCTTTTACGAACCAAGATTTGATGCTTCCATTTGTTAATTAATTTAATG-----G
TGCTTTTACGAACCAAGATTTGATGCTTCCATTTGTTAATTAATTTAATG-----G
\*\* \*\* \*\* \* .\*\* \*\* \*\* .:\*\*\*\*\* \*\* \*\* \* \*\* \*\* \* .\*\* \*\* \*\* .:\*\*\*\*\* \*\* \*\* \* \*\* \*\* \* .\*\* \*\* \*\* .:;\* \*\*

H. lupulus-HL.SW.v1.0.G001325.1
L.usitatissimum-LUS10031955
Textile-hemp-csa\_locus\_16122\_iso\_2\_len\_2075\_ver\_2
Marijuana-scaffold20047

CTTCGAGTCTATTATTTAGTCAGAGAATTTATGAGAAGATATCATTTTCTCATGGCAT
-----
C-----CACAG-AACTATAAGAAGATATCAT-TTCACCTGGCAT
C-----CACAG-AACTATAAGAAGATATCAT-TTCACCTGGCAT

H. lupulus-HL.SW.v1.0.G001325.1
L.usitatissimum-LUS10031955
Textile-hemp-csa\_locus\_16122\_iso\_2\_len\_2075\_ver\_2
Marijuana-scaffold20047

ATTTT- -TTTTGGTATCAATCTTCTTTCCCACTCTGCGACATTGACATCTAAGTTTTC
-----
ATTTTGTTTTTGCTCAATCTTCTTTCCCAAGTTTACACATGACATCTAAGTCTTC
ATTTTGTTTTTGCTCAATCTTCTTTCCCAAGTTTACACATGACATCTAAGTCTTC

H. lupulus-HL.SW.v1.0.G001325.1
L.usitatissimum-LUS10031955
Textile-hemp-csa\_locus\_16122\_iso\_2\_len\_2075\_ver\_2
Marijuana-scaffold20047

TTCATATTGAAATTTGTTAGCTAACAAATCAGATTCTT-TTCACTGTGAATCTGCTATG
-----
TTCATATTGAAATTTGTTAGCTAACAAATCAGATTCTT-TTCACTGTGAATCTGTTACATG
TTCATATTGAAATTTGTTAGCTAACAAATCAGATTCTT-TTCACTGTGAATCTGTTACATG

H. lupulus-HL.SW.v1.0.G001325.1
L.usitatissimum-LUS10031955
Textile-hemp-csa\_locus\_16122\_iso\_2\_len\_2075\_ver\_2
Marijuana-scaffold20047

AGTGTATCCGAGTAAGACCTTT-TGTTAGCAGAAATTTATGACATTTACATTTGGTGGT
-----
GGGTATCCGAGTATGACCTTTTGTGTTAGCTAAATTTATTTGCGTTACAAATGGTGGT
GGGTATCCGAGTATGACCTTTTGTGTTAGCTAAATTTATTTGCGTTACAAATGGTGGT

H. lupulus-HL.SW.v1.0.G001325.1
L.usitatissimum-LUS10031955

GCATCAGCTTGTACCGGGCTGTGCGAGGAATATGACAAGCAATGTTGTAAG----TT
-----

```

Textile-hemp-csa_locus_16122_iso_2_len_2075_ver_2
Marijuana-scaffold20047
GCATCAACTTTGTACCAGGGCTGTGCCAGGAATATGACAAGCAATGTATTGAGTTGAGTT
GCATCAACTTTGTACCAGGGCTGTGCCAGGAATATGACAAGCAATGTATTGAGTTGAGTT

H.lupulus-HL.SW.v1.0.G001325.1
L.usitatissimum-LUS10031955
Textile-hemp-csa_locus_16122_iso_2_len_2075_ver_2
Marijuana-scaffold20047
GAGTTGGGACCAAATTTGGGTCCTTTGGGTTTGTAAATAAGAATGTAGGTTGGCTGGGGAG
-----
GAGTTGAGACCAAATTTGGGTCCTTTGGGCTTGTGTAATAAATTT-----
GAGTTGAGACCAAATTTGGGTCCTTTGGGCTTGTGTAATAAATTT-----

H.lupulus-HL.SW.v1.0.G001325.1
L.usitatissimum-LUS10031955
Textile-hemp-csa_locus_16122_iso_2_len_2075_ver_2
Marijuana-scaffold20047
GAAATGTGAGAAGGCTCTTT-CTTGAAGTGTGTACACTATTTAAAAACAATTTGCACATT
-----
-AAATTTAAGAAGGCTCTTTTTTTTGAAGTGTGTACA-----ATCTGCACATT
-AAATTTAAGAAGGCTCTTTTTTTTGAAGTGTGTACA-----ATCTGCACATT

H.lupulus-HL.SW.v1.0.G001325.1
L.usitatissimum-LUS10031955
Textile-hemp-csa_locus_16122_iso_2_len_2075_ver_2
Marijuana-scaffold20047
AATATGTAATTTATAAAGTTTTGCTTTT-----
-----
AATTTGTATATCATAAAGTTTTACTTTTAAA-----
AATTTGTATATCATAAAGTTTTACTTTTATCACTATAGTAATTTTAAACTTAGTTTATG

H.lupulus-HL.SW.v1.0.G001325.1
L.usitatissimum-LUS10031955
Textile-hemp-csa_locus_16122_iso_2_len_2075_ver_2
Marijuana-scaffold20047
-----
-----
-----
TATTGCAAGTAAACTAGAGTTGATTTTTTTTTTTTTTTTTTTTTTTTGGATTAACAACACTAGAGT

H.lupulus-HL.SW.v1.0.G001325.1
L.usitatissimum-LUS10031955
Textile-hemp-csa_locus_16122_iso_2_len_2075_ver_2
Marijuana-scaffold20047
-----
-----
-----
TGATTTAAA

```

**Figure S3.** Alignment of the hemp reference genes and the orthologs from flax, hop and marijuana. The primers described in the present work are underlined and the amplified region is highlighted in yellow.
